# Supplementary material for: Oleanane-Type Saponins from the Roots of Ligulariopsis shichuana and Their α-Glucosidase Inhibitory Activities
Source: PubMed Central journal article supplement (PMC6150216; doi:10.3390/molecules22111981), 2017-11-17
Supplement: molecules-22-01981-s001.pdf [file molecules-22-01981-s001.pdf]

## Supporting Information

| <b>Table of Contents</b> |                                                                                        | <b>Page</b> |
|--------------------------|----------------------------------------------------------------------------------------|-------------|
| Figure S1.               | <sup>1</sup> H NMR (600 MHz, CD <sub>3</sub> OD) spectrum of compound <b>1</b>         | 4           |
| Figure S2.               | <sup>13</sup> C NMR (150 MHz, CD <sub>3</sub> OD) spectrum of compound <b>1</b>        | 5           |
| Figure S3.               | <sup>1</sup> H- <sup>1</sup> H COSY spectrum (CD <sub>3</sub> OD) of compound <b>1</b> | 6           |
| Figure S4.               | HSQC spectrum (CD <sub>3</sub> OD) of compound <b>1</b>                                | 7           |
| Figure S5.               | HMBC spectrum (CD <sub>3</sub> OD) of compound <b>1</b>                                | 8           |
| Figure S6.               | NOESY spectrum (CD <sub>3</sub> OD) of compound <b>1</b>                               | 9           |
| Figure S7.               | HRESIMS spectrum of compound <b>1</b>                                                  | 10          |
| Figure S8.               | <sup>1</sup> H NMR (600 MHz, CD <sub>3</sub> OD) spectrum of compound <b>2</b>         | 11          |
| Figure S9.               | <sup>13</sup> C NMR (150 MHz, CD <sub>3</sub> OD) spectrum of compound <b>2</b>        | 12          |
| Figure S10.              | <sup>1</sup> H- <sup>1</sup> H COSY spectrum (CD <sub>3</sub> OD) of compound <b>2</b> | 13          |
| Figure S11.              | HSQC spectrum (CD <sub>3</sub> OD) of compound <b>2</b>                                | 14          |
| Figure S12.              | HMBC spectrum (CD <sub>3</sub> OD) of compound <b>2</b>                                | 15          |
| Figure S13.              | HRESIMS spectrum of compound <b>2</b>                                                  | 16          |
| Figure S14.              | <sup>1</sup> H NMR (600 MHz, CD <sub>3</sub> OD) spectrum of compound <b>3</b>         | 17          |
| Figure S15.              | <sup>13</sup> C NMR (150 MHz, CD <sub>3</sub> OD) spectrum of compound <b>3</b>        | 18          |
| Figure S16.              | <sup>1</sup> H- <sup>1</sup> H COSY spectrum (CD <sub>3</sub> OD) of compound <b>3</b> | 19          |
| Figure S17.              | HSQC spectrum (CD <sub>3</sub> OD) of compound <b>3</b>                                | 20          |
| Figure S18.              | HMBC spectrum (CD <sub>3</sub> OD) of compound <b>3</b>                                | 21          |
| Figure S19.              | NOESY spectrum (CD <sub>3</sub> OD) of compound <b>3</b>                               | 22          |
| Figure S20.              | HRESIMS spectrum of compound <b>3</b>                                                  | 23          |
| Figure S21.              | <sup>1</sup> H NMR (600 MHz, CD <sub>3</sub> OD) spectrum of compound <b>4</b>         | 24          |
| Figure S22.              | <sup>13</sup> C NMR (150 MHz, CD <sub>3</sub> OD) spectrum of compound <b>4</b>        | 25          |
| Figure S23.              | <sup>1</sup> H- <sup>1</sup> H COSY spectrum (CD <sub>3</sub> OD) of compound <b>4</b> | 26          |
| Figure S24.              | HSQC spectrum (CD <sub>3</sub> OD) of compound <b>4</b>                                | 27          |
| Figure S25.              | HMBC spectrum (CD <sub>3</sub> OD) of compound <b>4</b>                                | 28          |
| Figure S26.              | NOESY spectrum (CD <sub>3</sub> OD) of compound <b>4</b>                               | 29          |
| Figure S27.              | HRESIMS spectrum of compound <b>4</b>                                                  | 30          |
| Figure S28.              | <sup>1</sup> H NMR (600 MHz, CD <sub>3</sub> OD) spectrum of compound <b>5</b>         | 31          |
| Figure S29.              | <sup>13</sup> C NMR (150 MHz, CD <sub>3</sub> OD) spectrum of compound <b>5</b>        | 32          |
| Figure S30.              | <sup>1</sup> H- <sup>1</sup> H COSY spectrum (CD <sub>3</sub> OD) of compound <b>5</b> | 33          |
| Figure S31.              | HSQC spectrum (CD <sub>3</sub> OD) of compound <b>5</b>                                | 34          |
| Figure S32.              | HMBC spectrum (CD <sub>3</sub> OD) of compound <b>5</b>                                | 35          |
| Figure S33.              | HRESIMS spectrum of compound <b>5</b>                                                  | 36          |

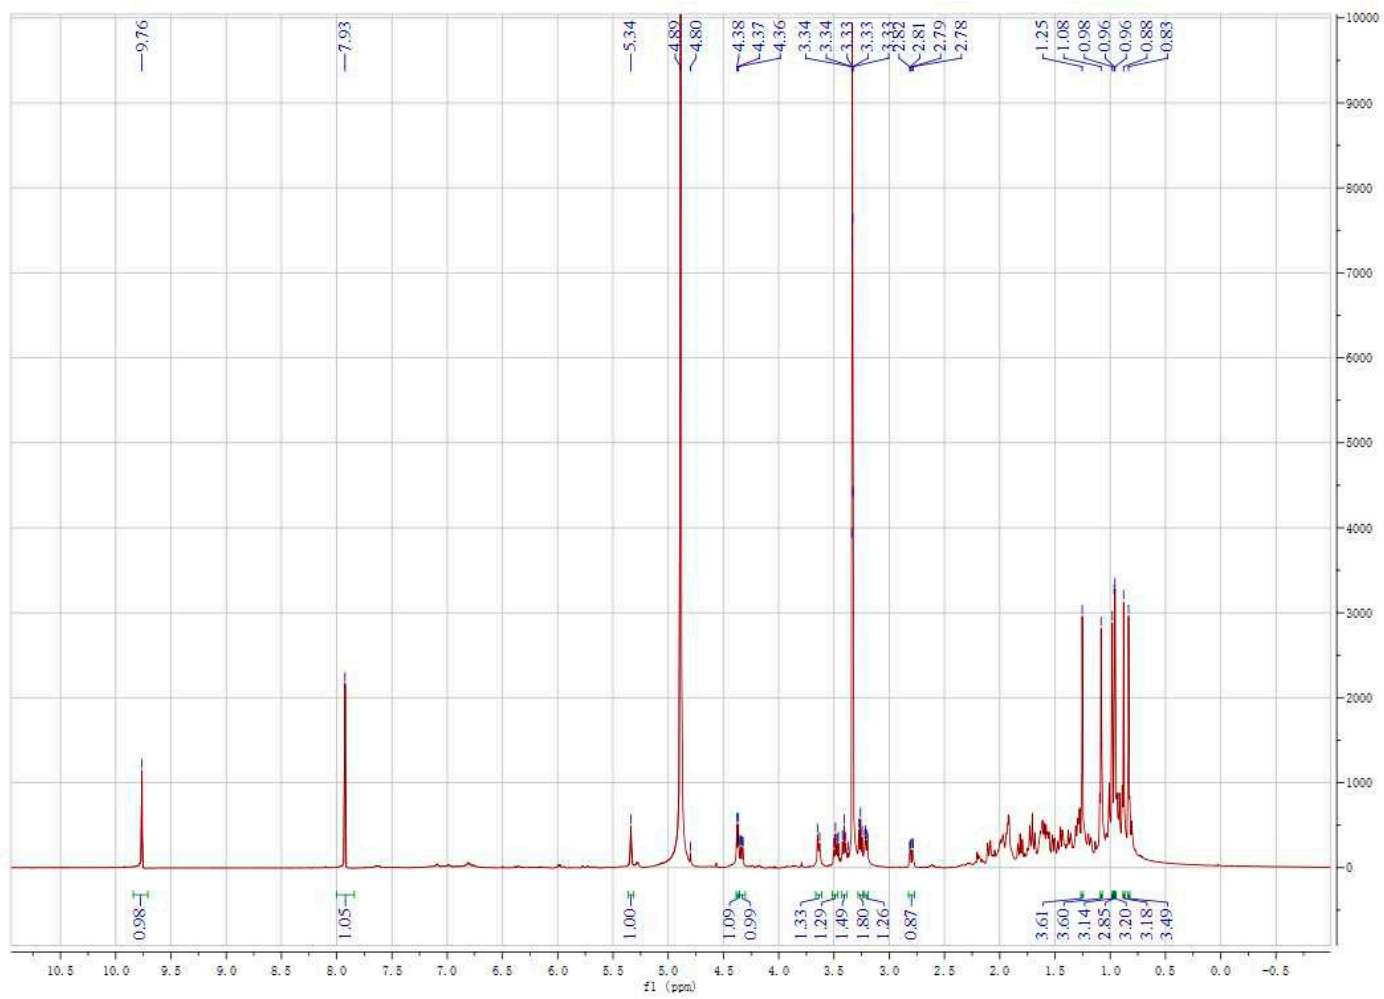

Figure S1. <sup>1</sup>H NMR (600 MHz, CD<sub>3</sub>OD) spectrum of compound 1

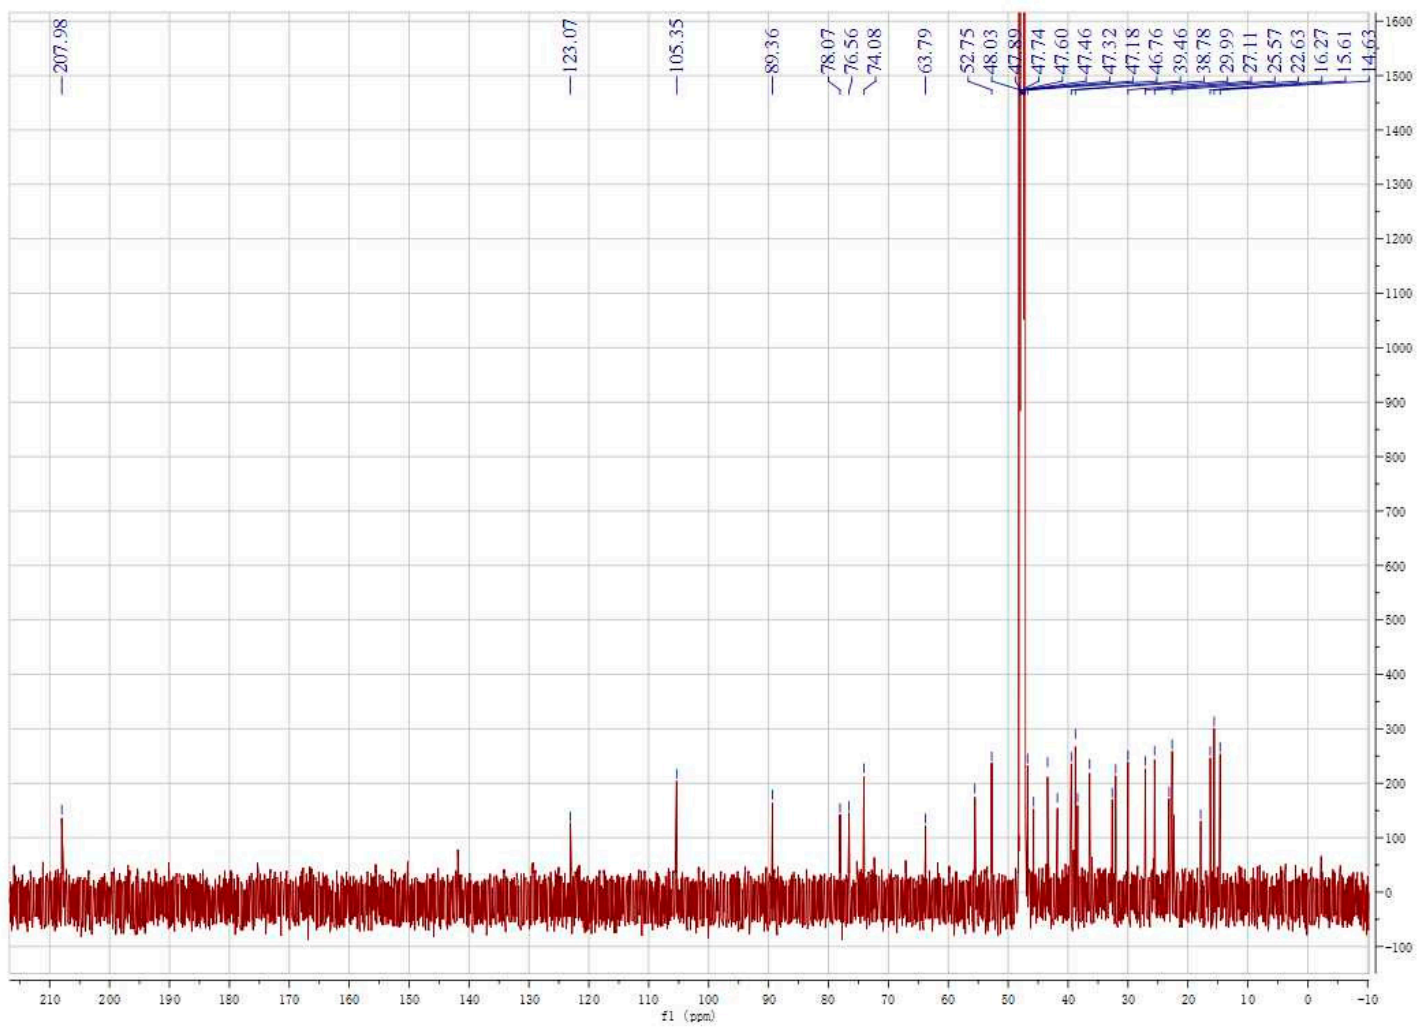

Figure S2.  $^{13}\text{C}$ -NMR (150 MHz,  $\text{CD}_3\text{OD}$ ) spectrum of compound **1**

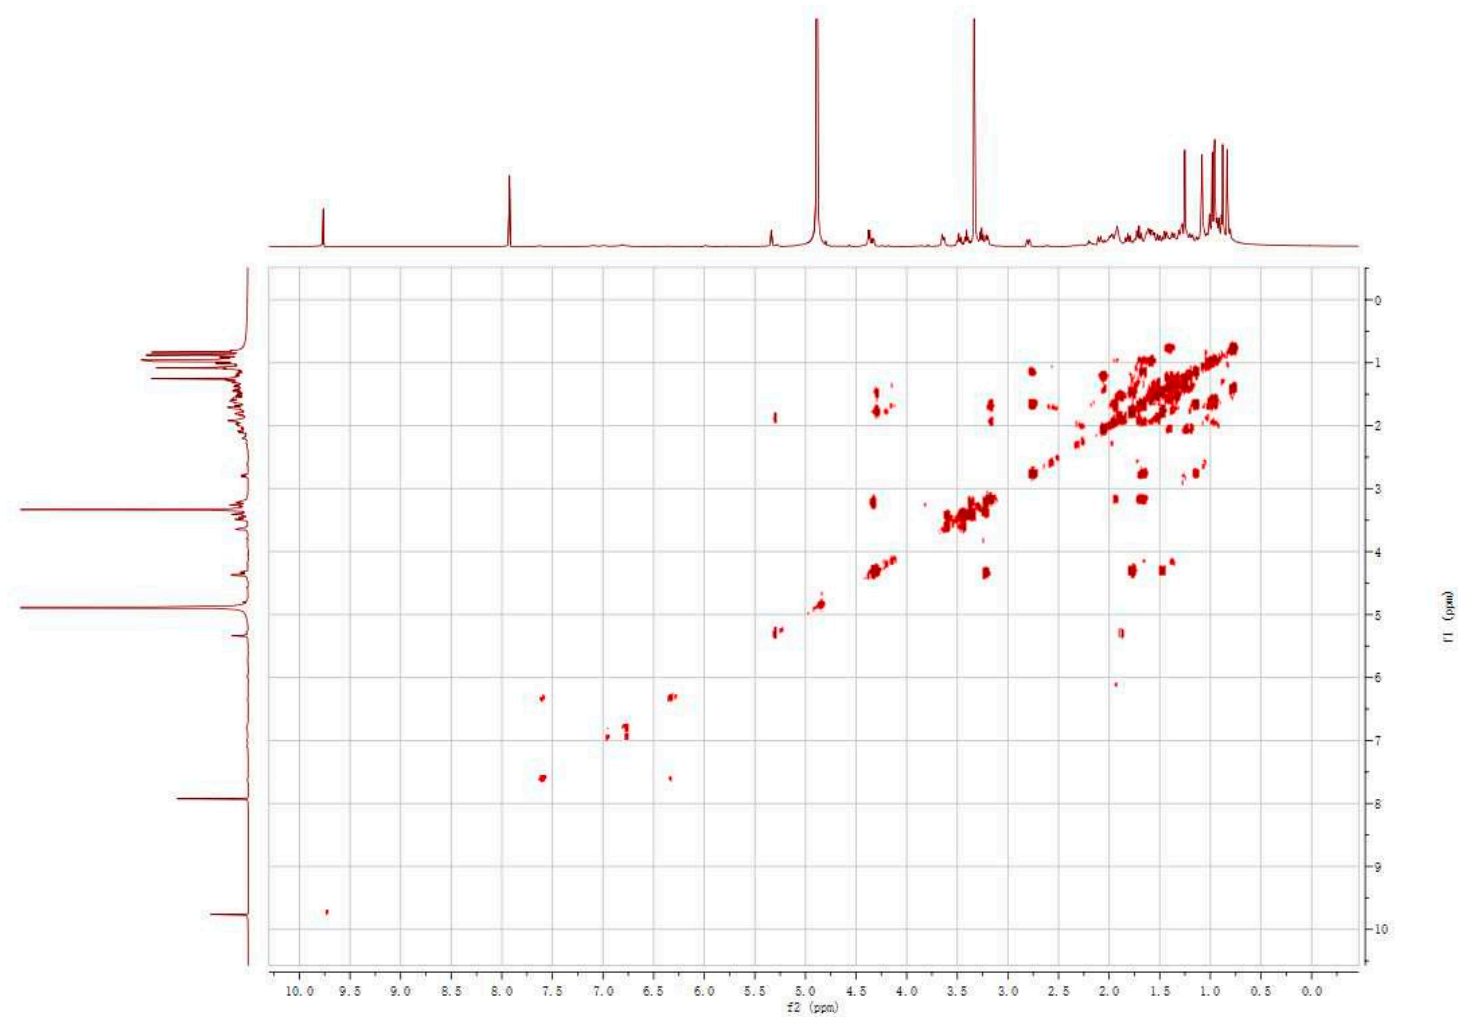

Figure S3.  $^1\text{H}$ - $^1\text{H}$  COSY spectrum ( $\text{CD}_3\text{OD}$ ) of compound **1**

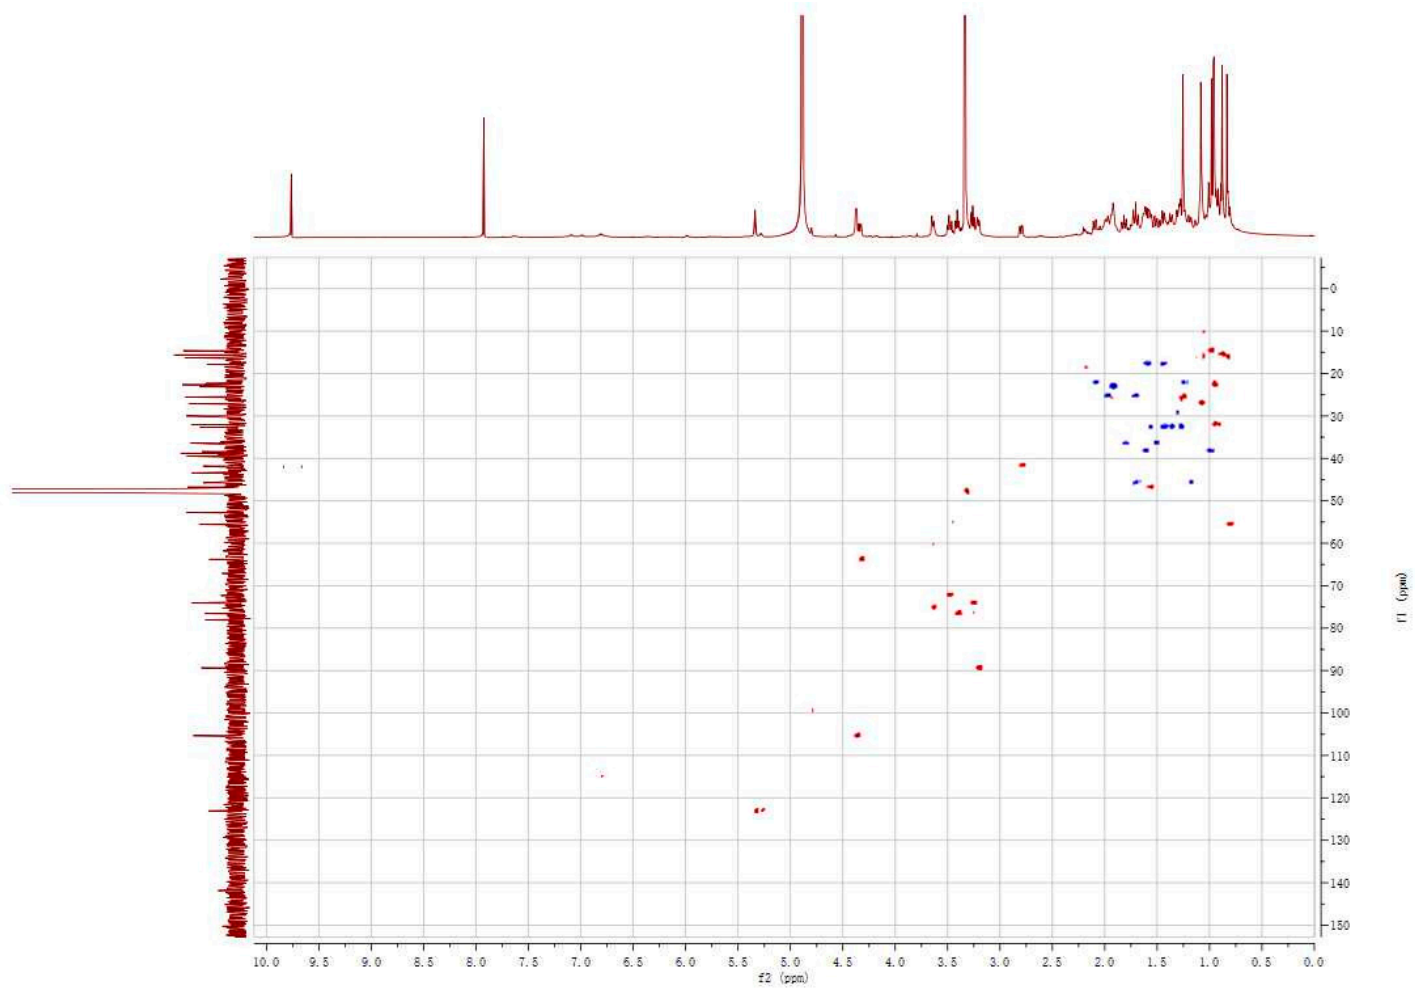

Figure S4. HSQC spectrum ( $\text{CD}_3\text{OD}$ ) of compound **1**

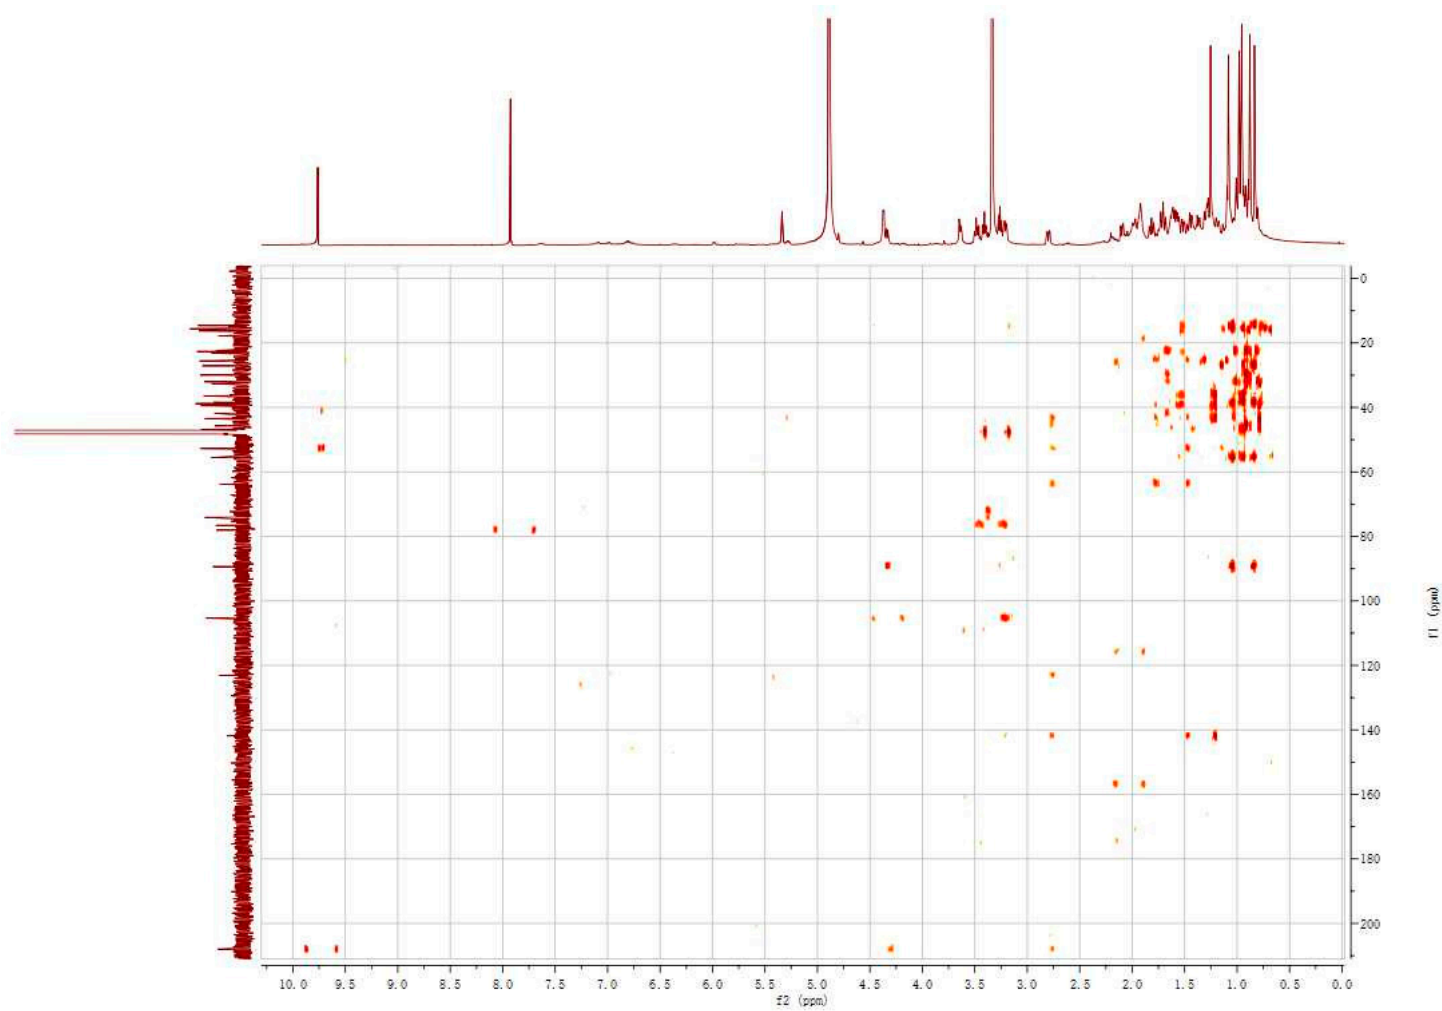

Figure S5. HMBC spectrum (CD<sub>3</sub>OD) of compound **1**

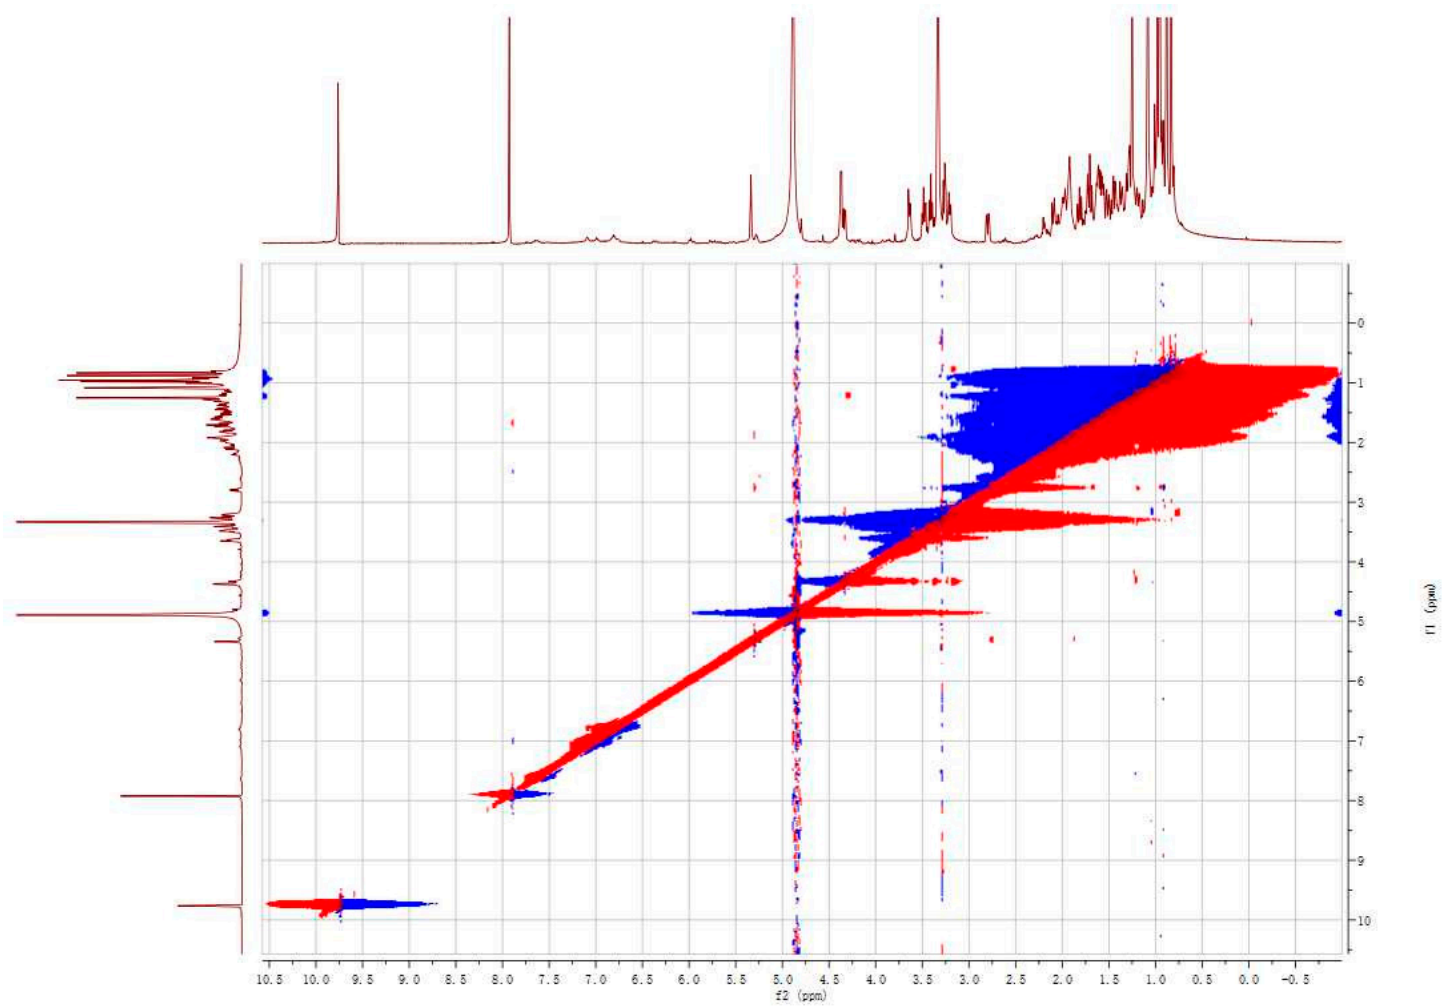

Figure S6. NOESY spectrum (CD<sub>3</sub>OD) of compound 1

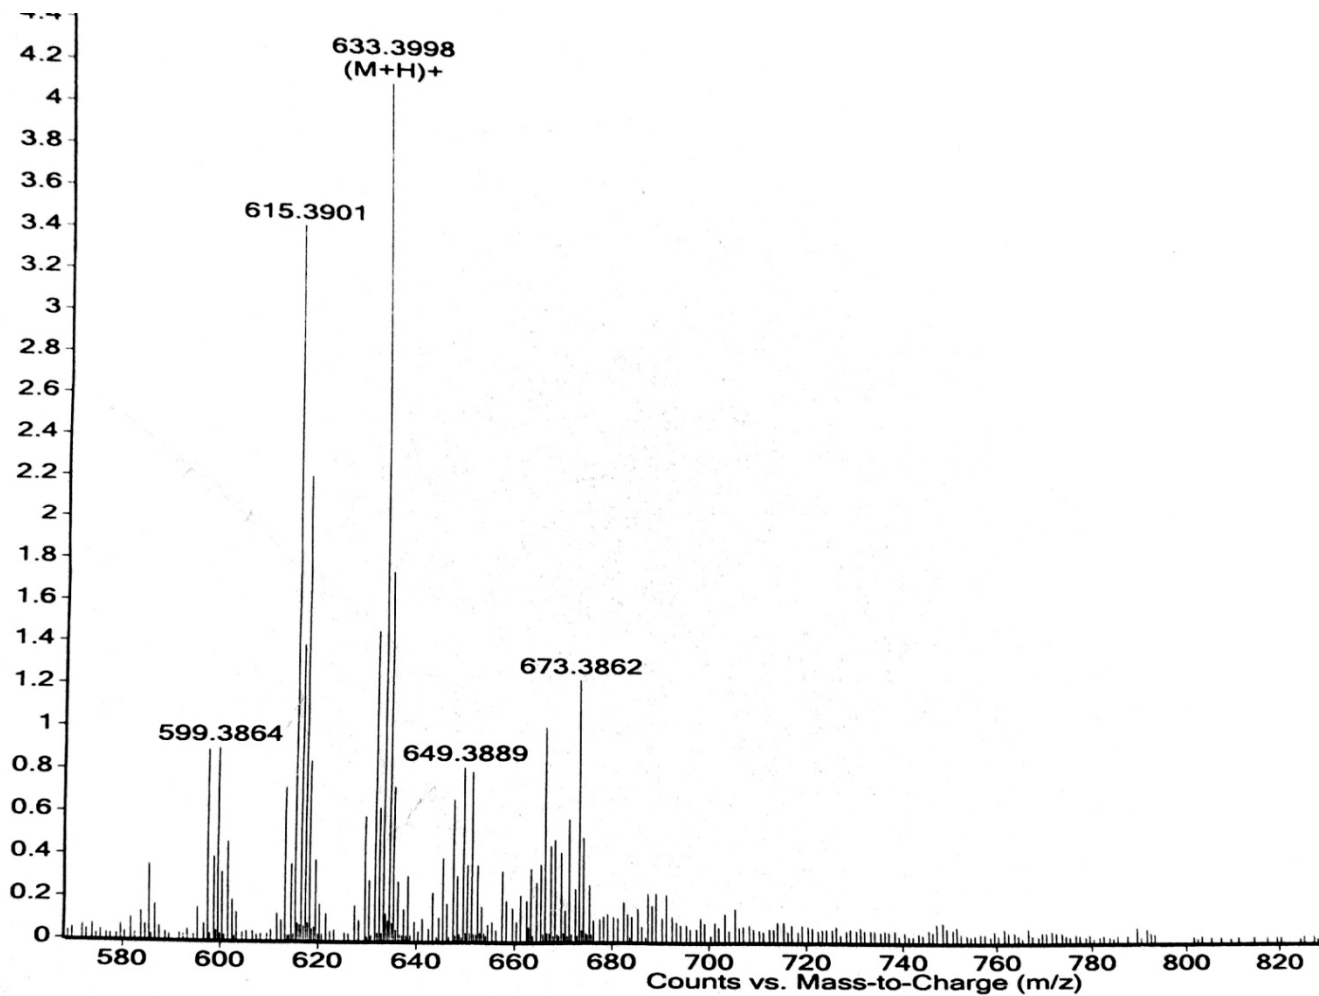

Figure S7. HRESIMS spectrum of compound 1



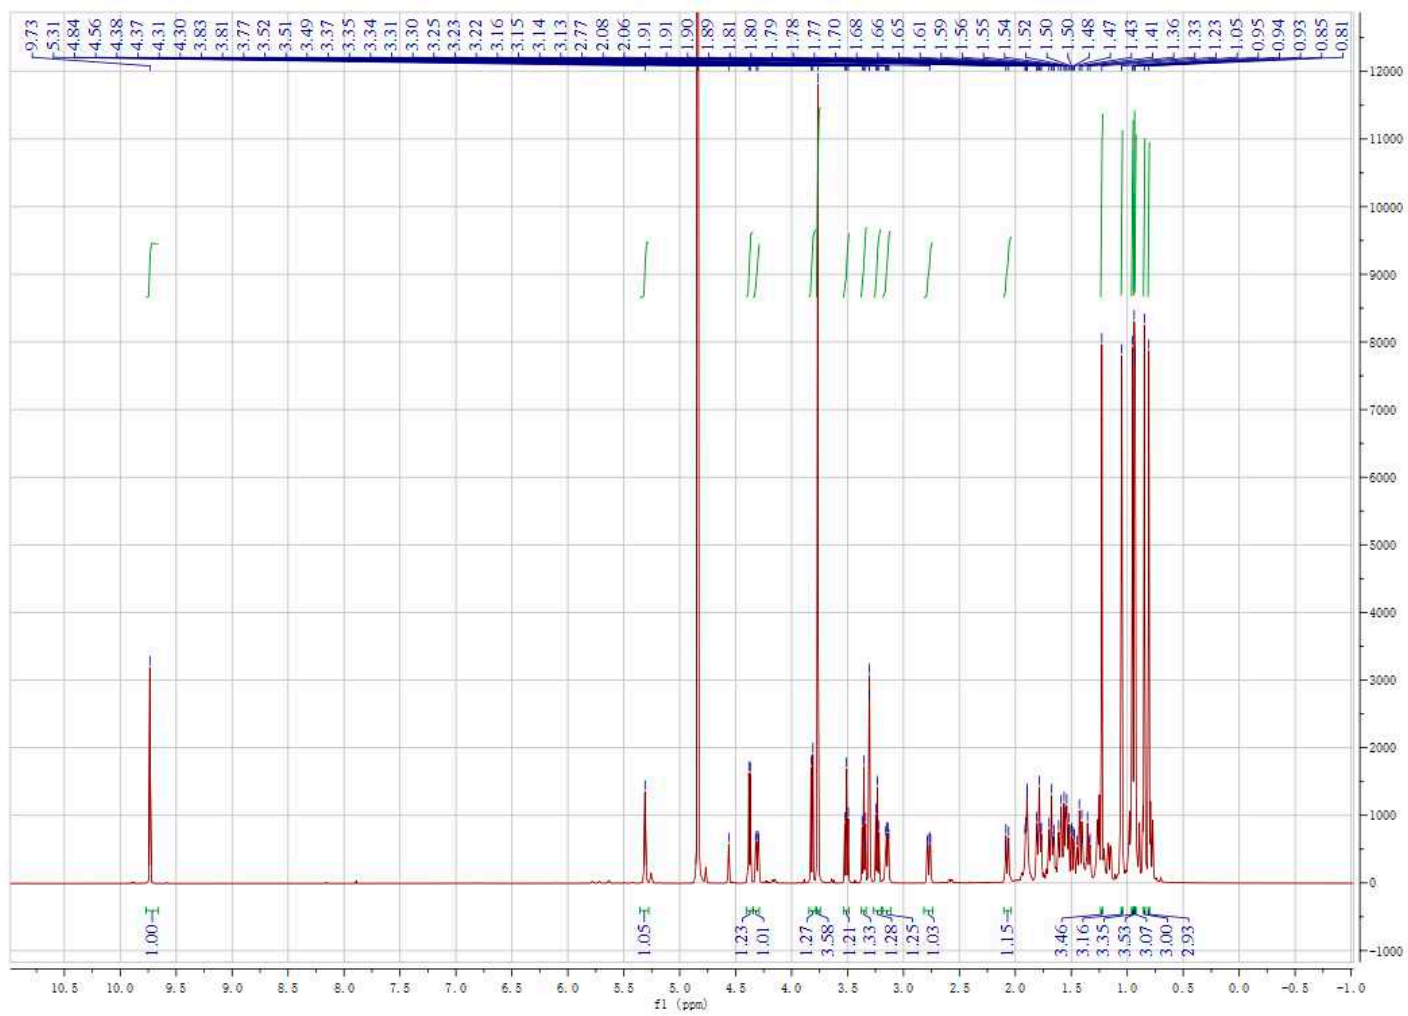

Figure S8.  $^1\text{H}$  NMR (600 MHz,  $\text{CD}_3\text{OD}$ ) spectrum of compound 2

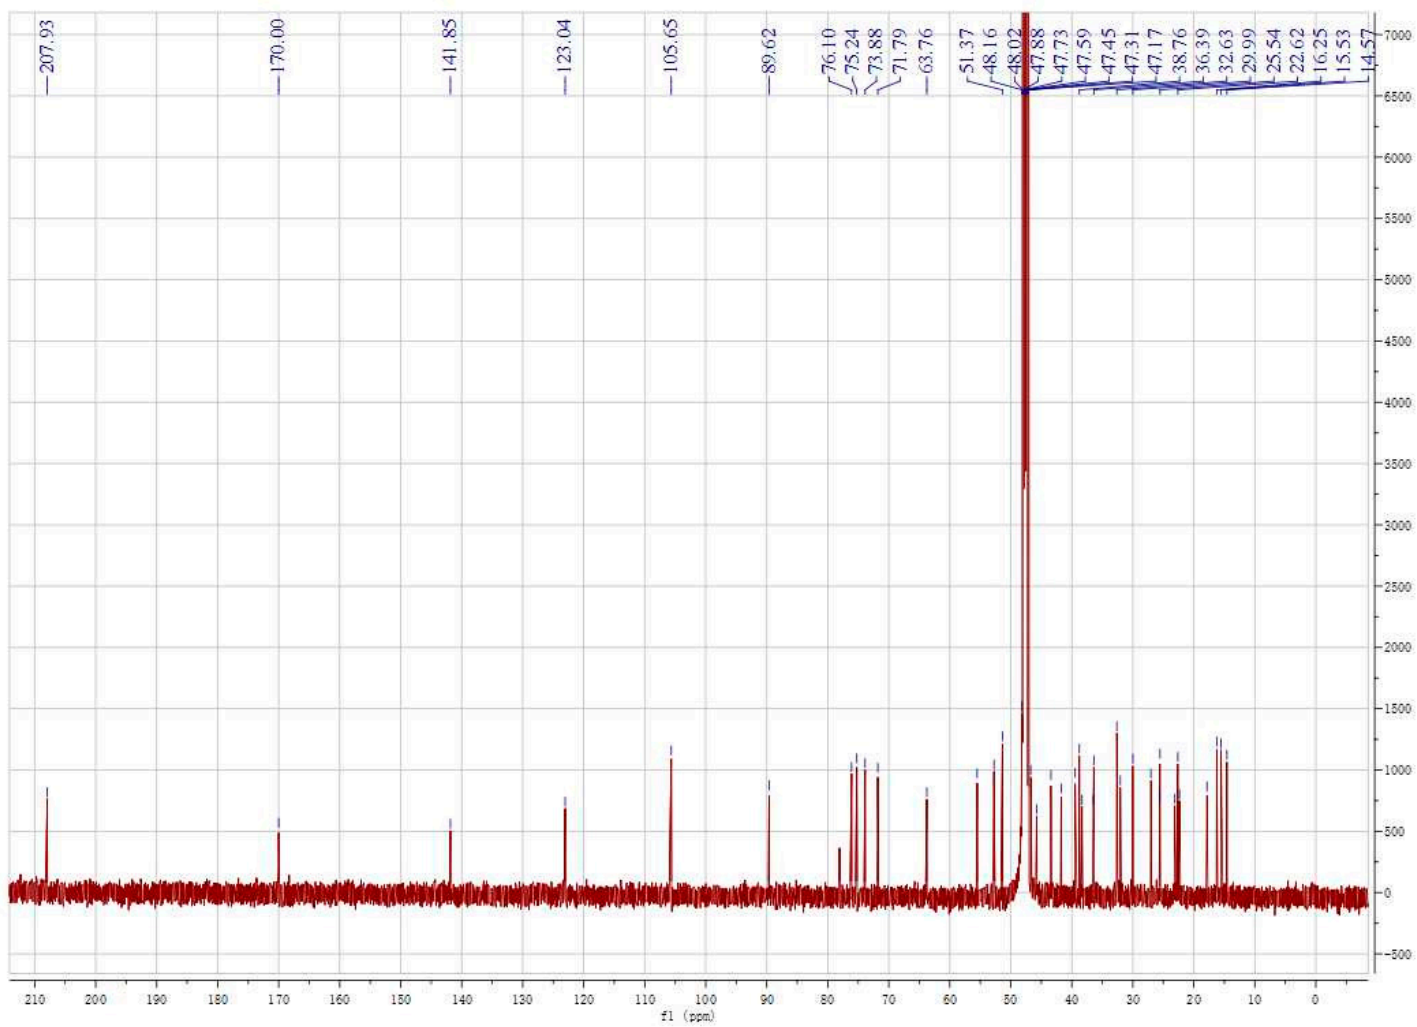

Figure S9. <sup>13</sup>C NMR (150 MHz, CD<sub>3</sub>OD) spectrum of compound 2

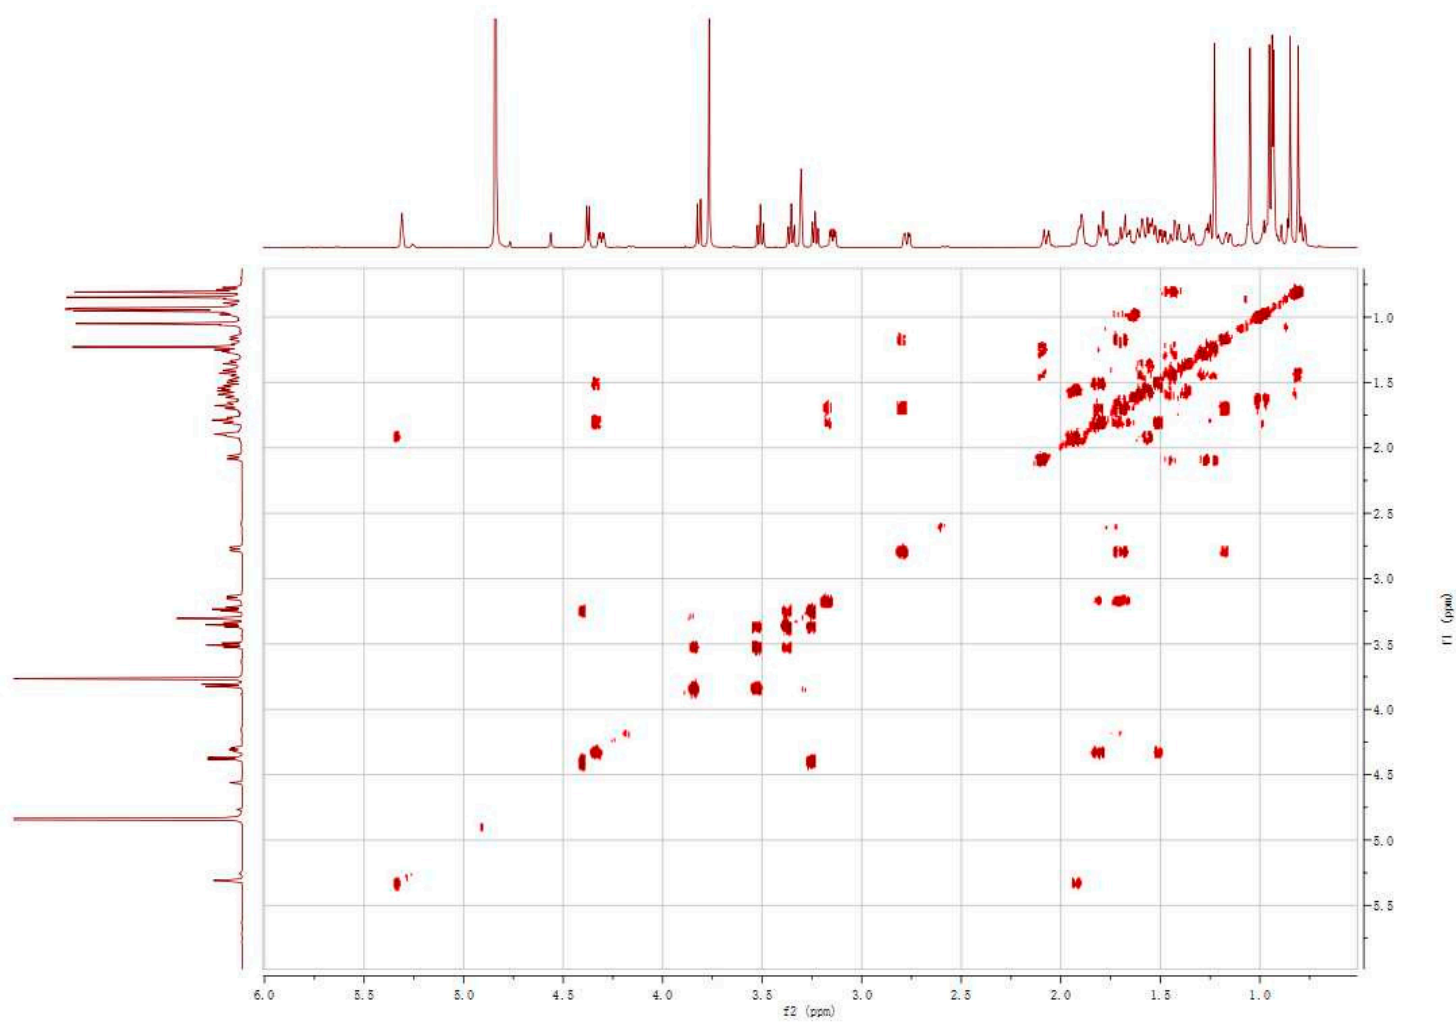

Figure S10.  $^1\text{H}$ - $^1\text{H}$  COSY spectrum ( $\text{CD}_3\text{OD}$ ) of compound **2**

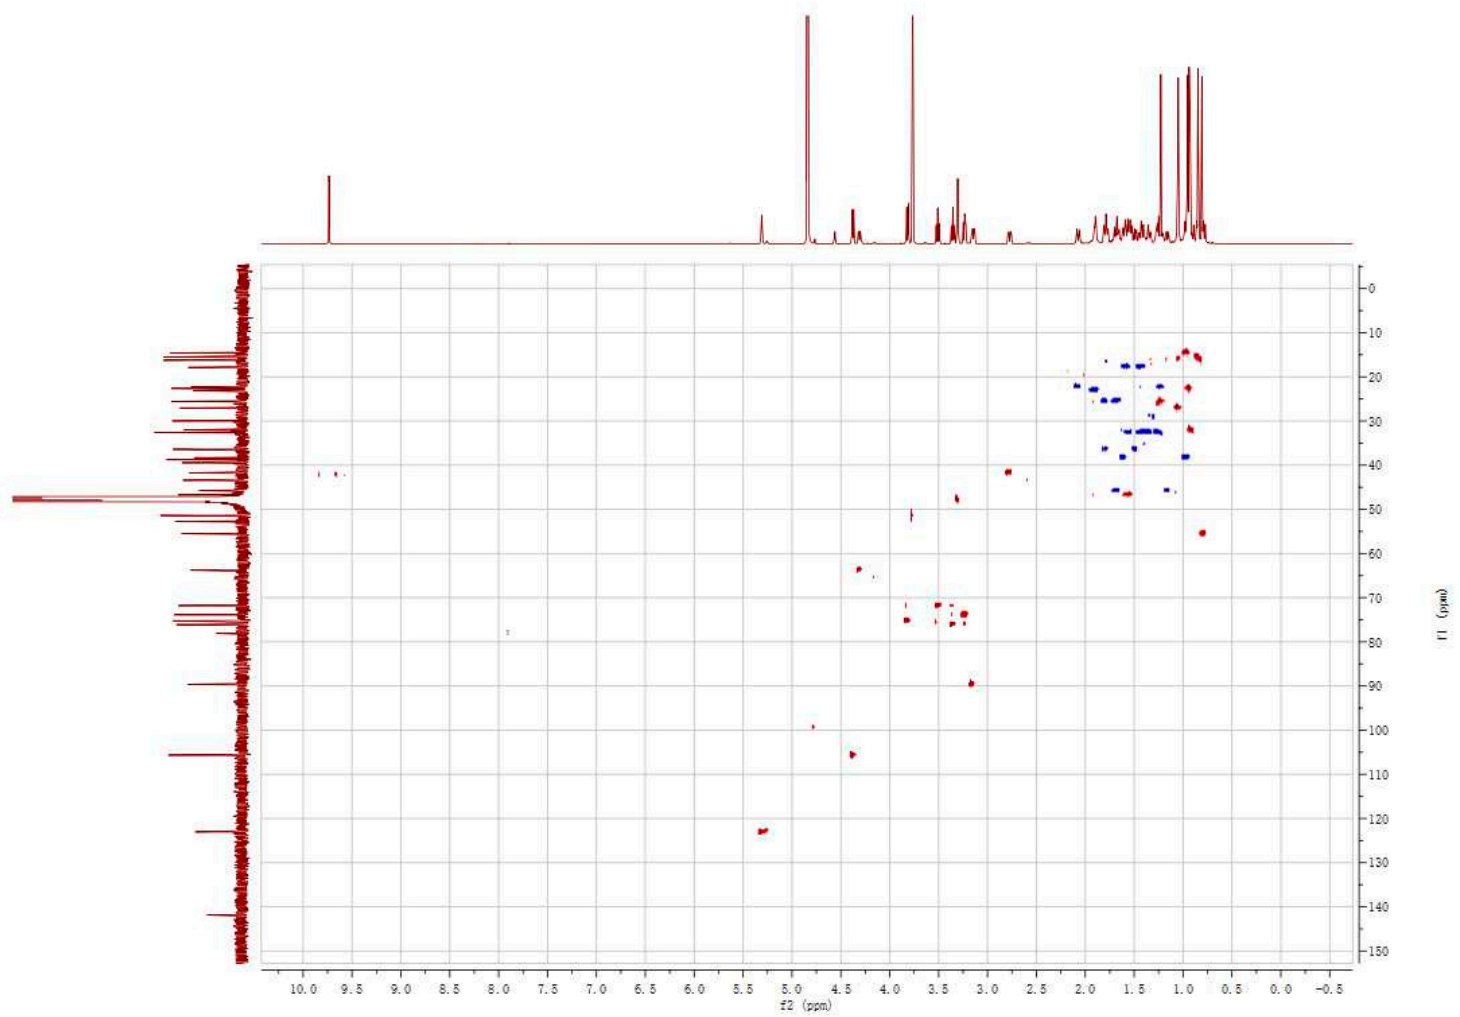

Figure S11. HSQC spectrum (CD<sub>3</sub>OD) of compound 2

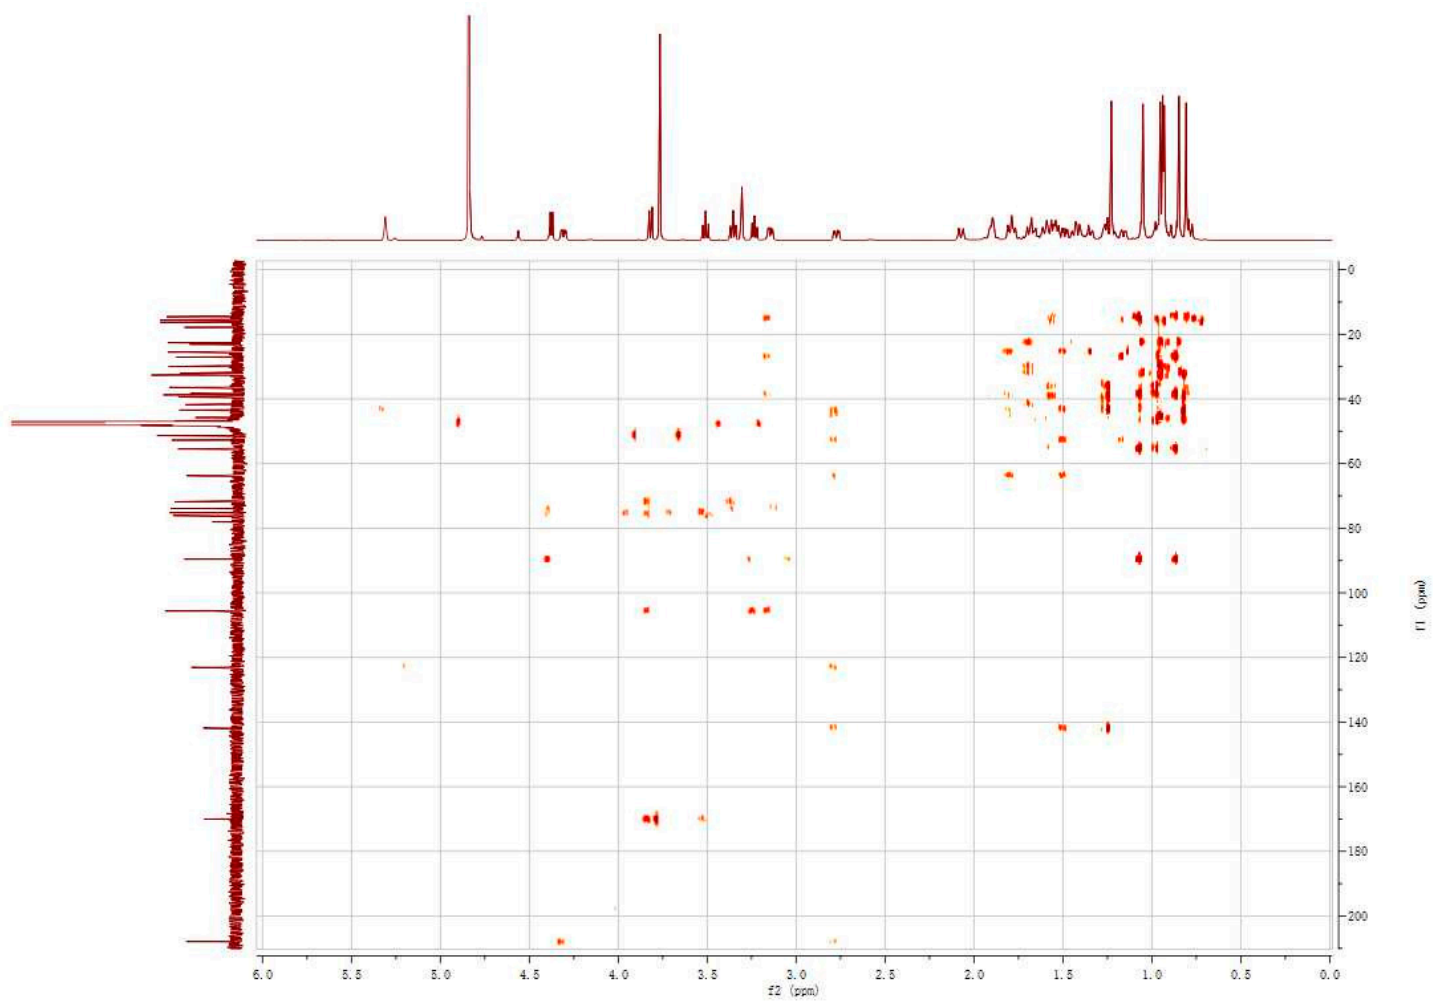

Figure S12. HMBC spectrum (CD<sub>3</sub>OD) of compound 2

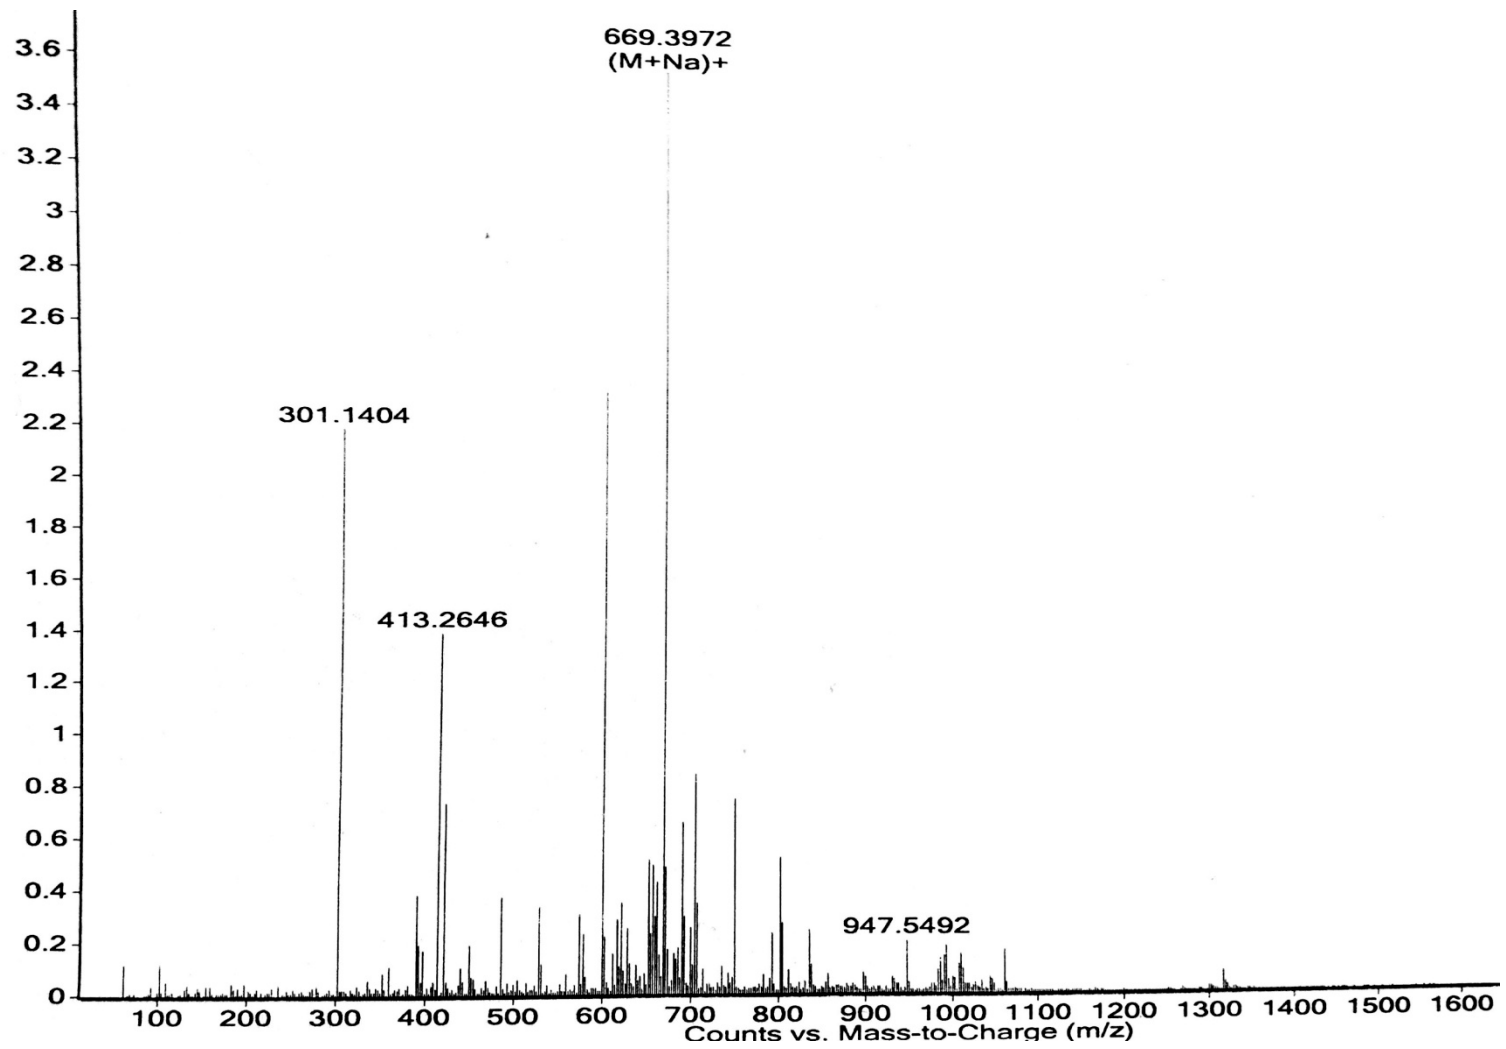

Figure S13. HRESIMS spectrum of compound 2

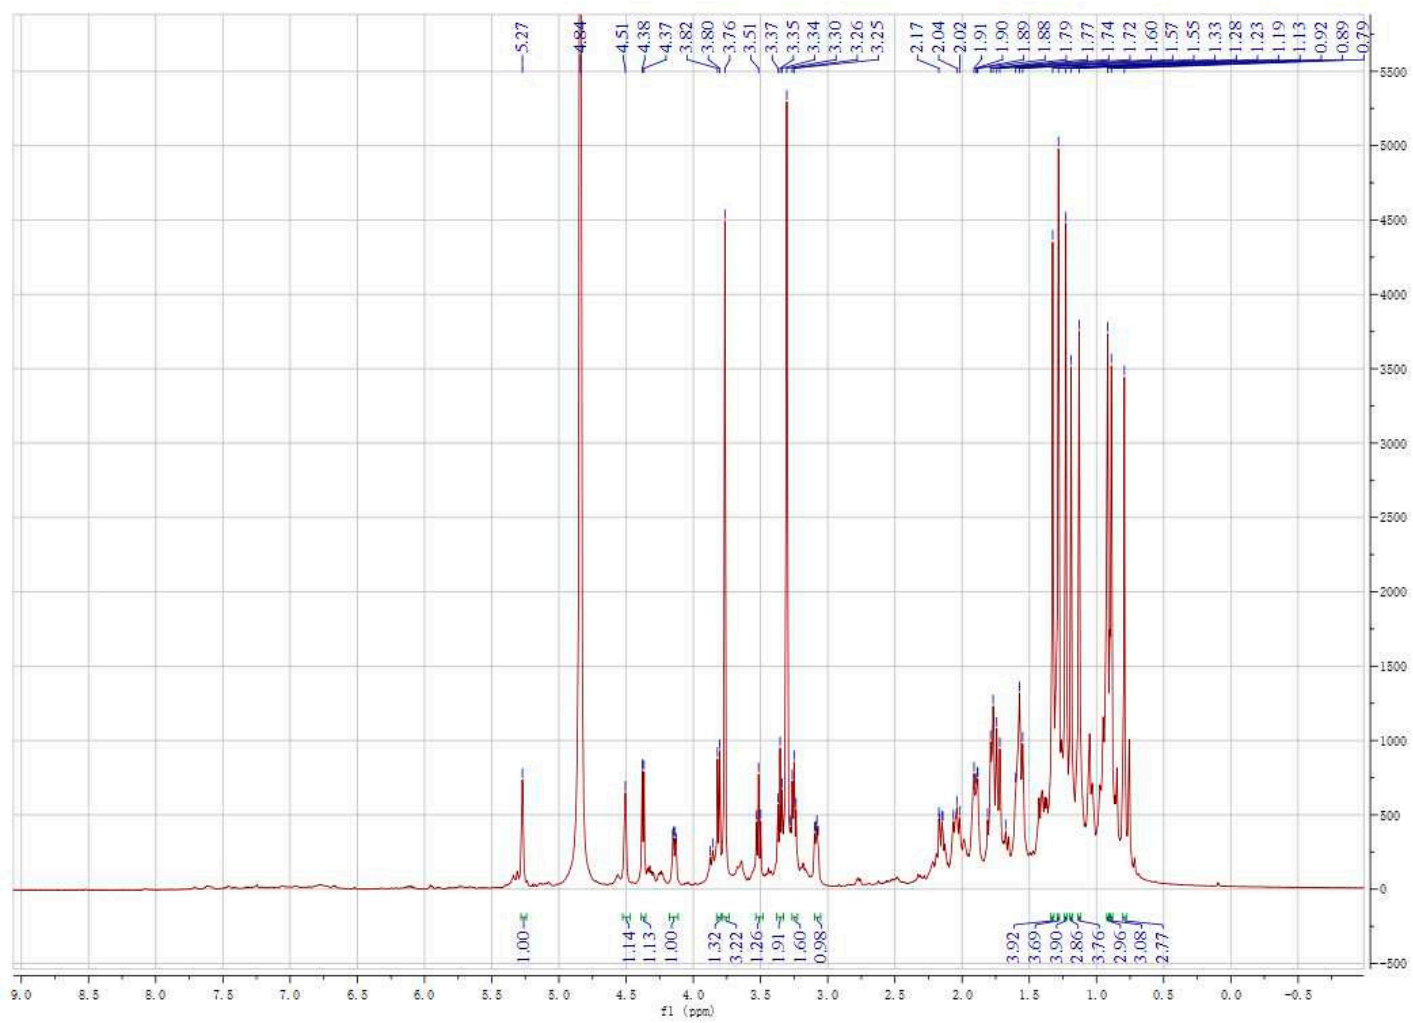

Figure S14. <sup>1</sup>H NMR (600 MHz, CD<sub>3</sub>OD) spectrum of compound 3

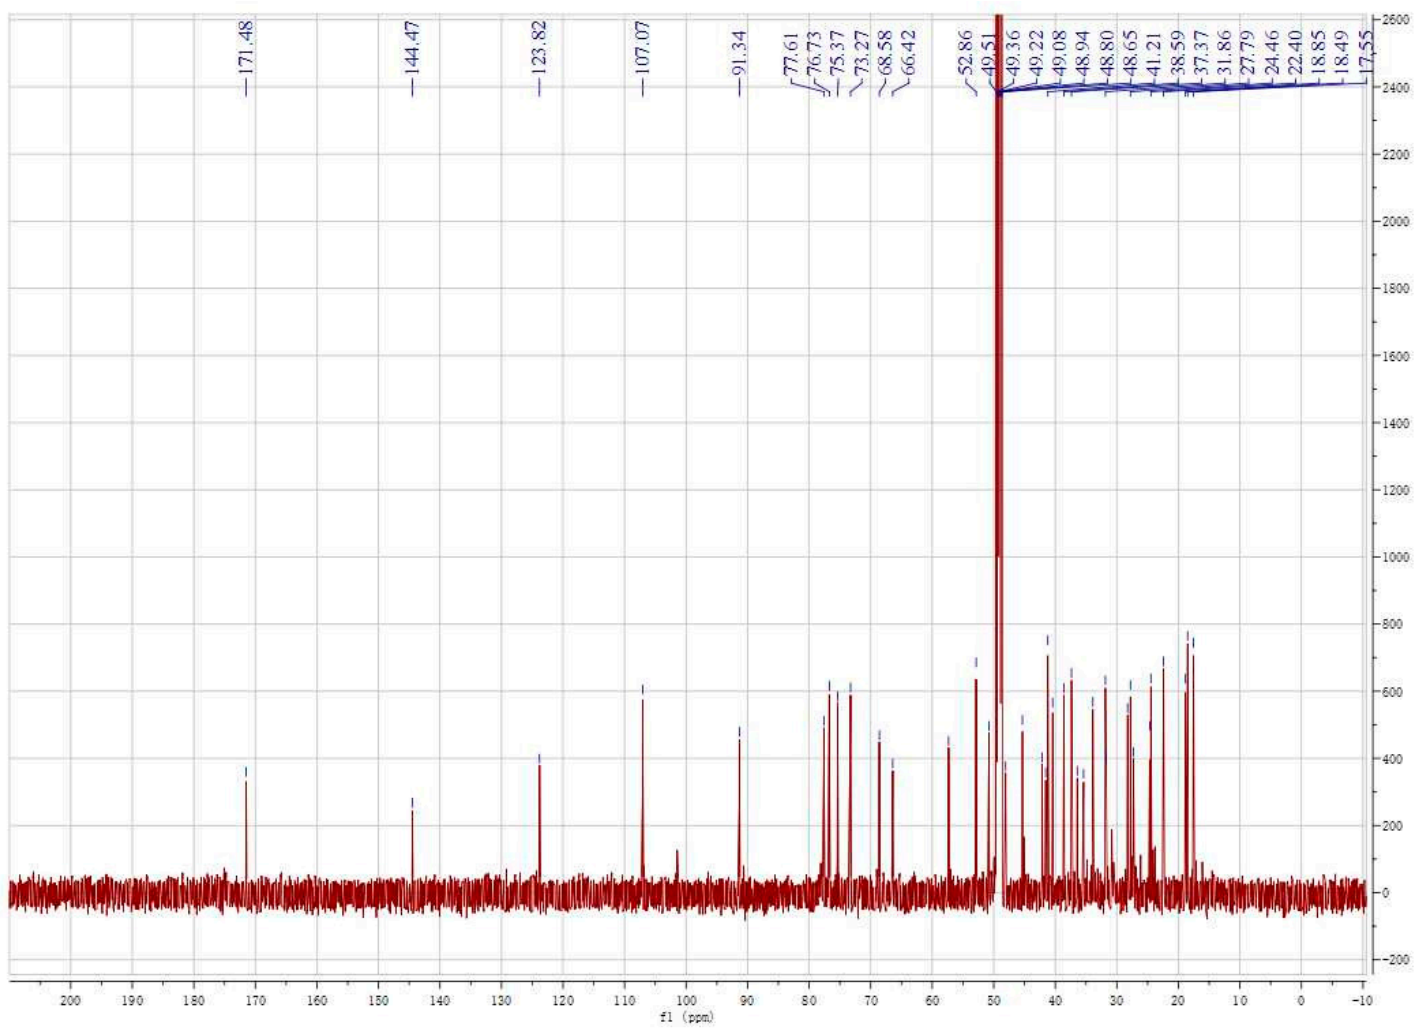

Figure S15.  $^{13}\text{C}$  NMR (150 MHz,  $\text{CD}_3\text{OD}$ ) spectrum of compound 3



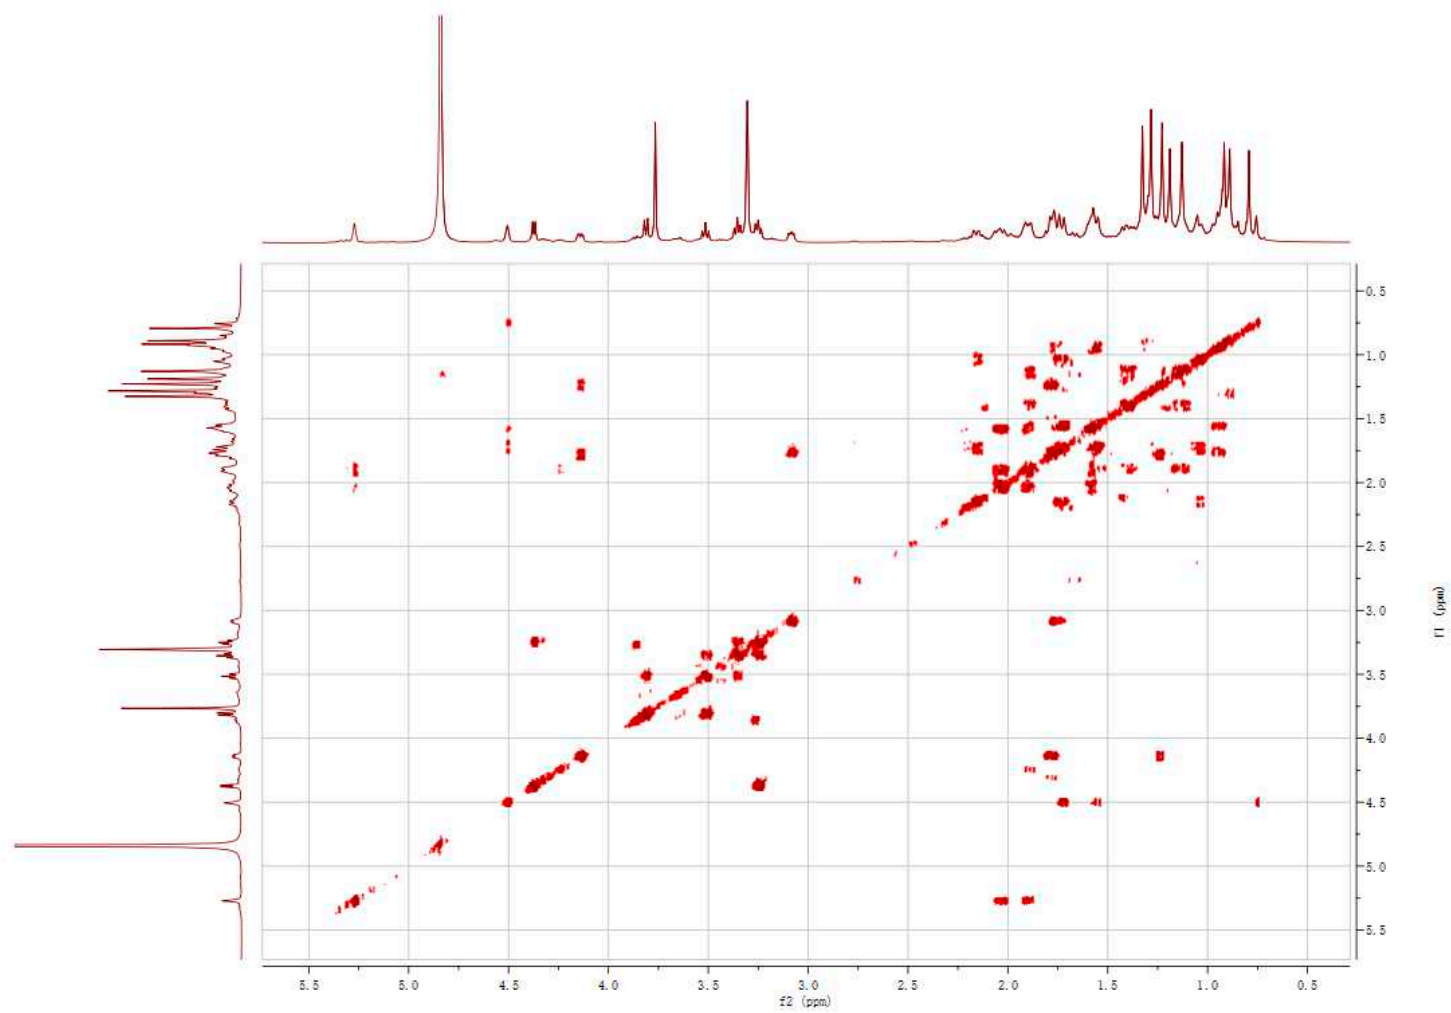

Figure S16.  $^1\text{H}$ - $^1\text{H}$  COSY spectrum ( $\text{CD}_3\text{OD}$ ) of compound 3

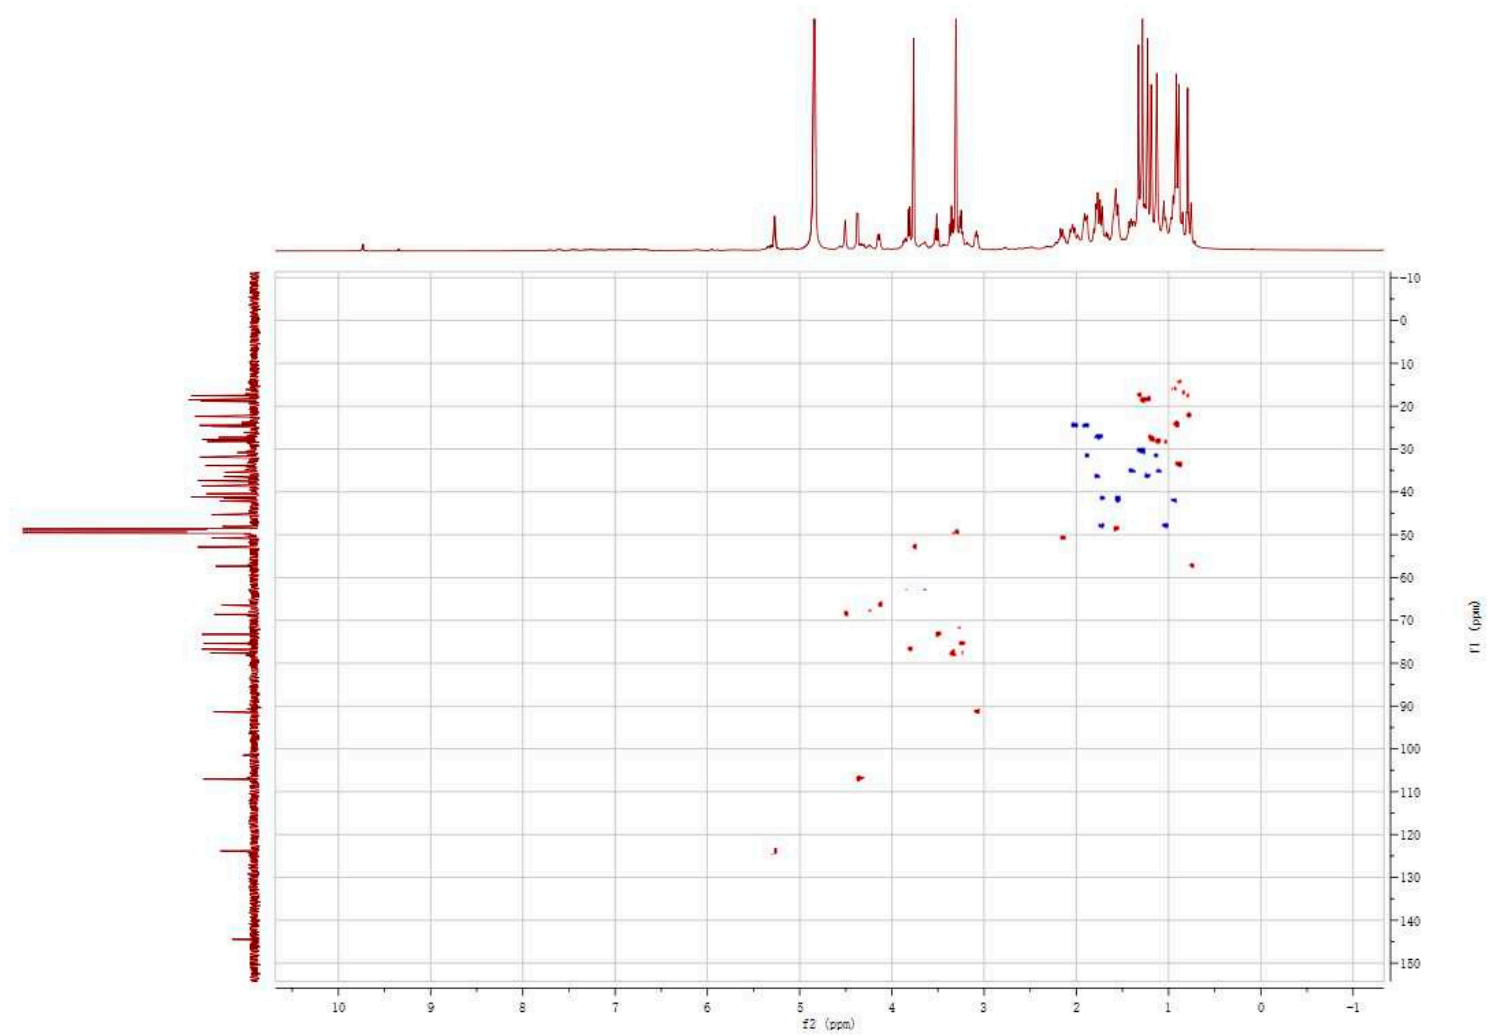

Figure S17. HSQC spectrum (CD<sub>3</sub>OD) of compound 3

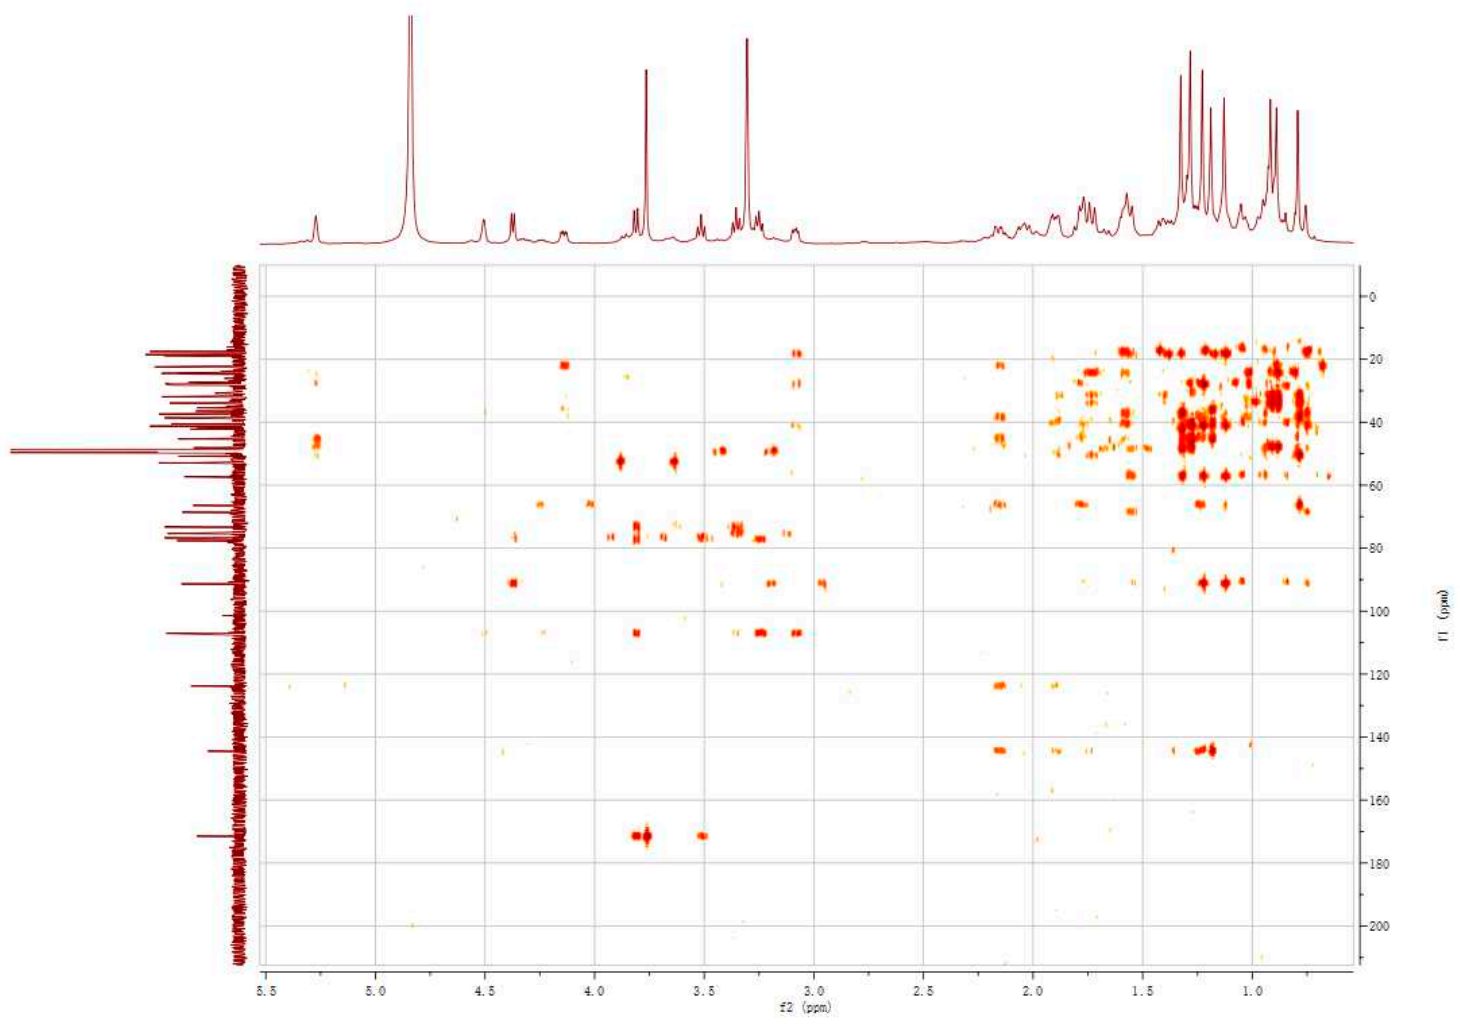

Figure S18. HMBC spectrum (CD<sub>3</sub>OD) of compound 3

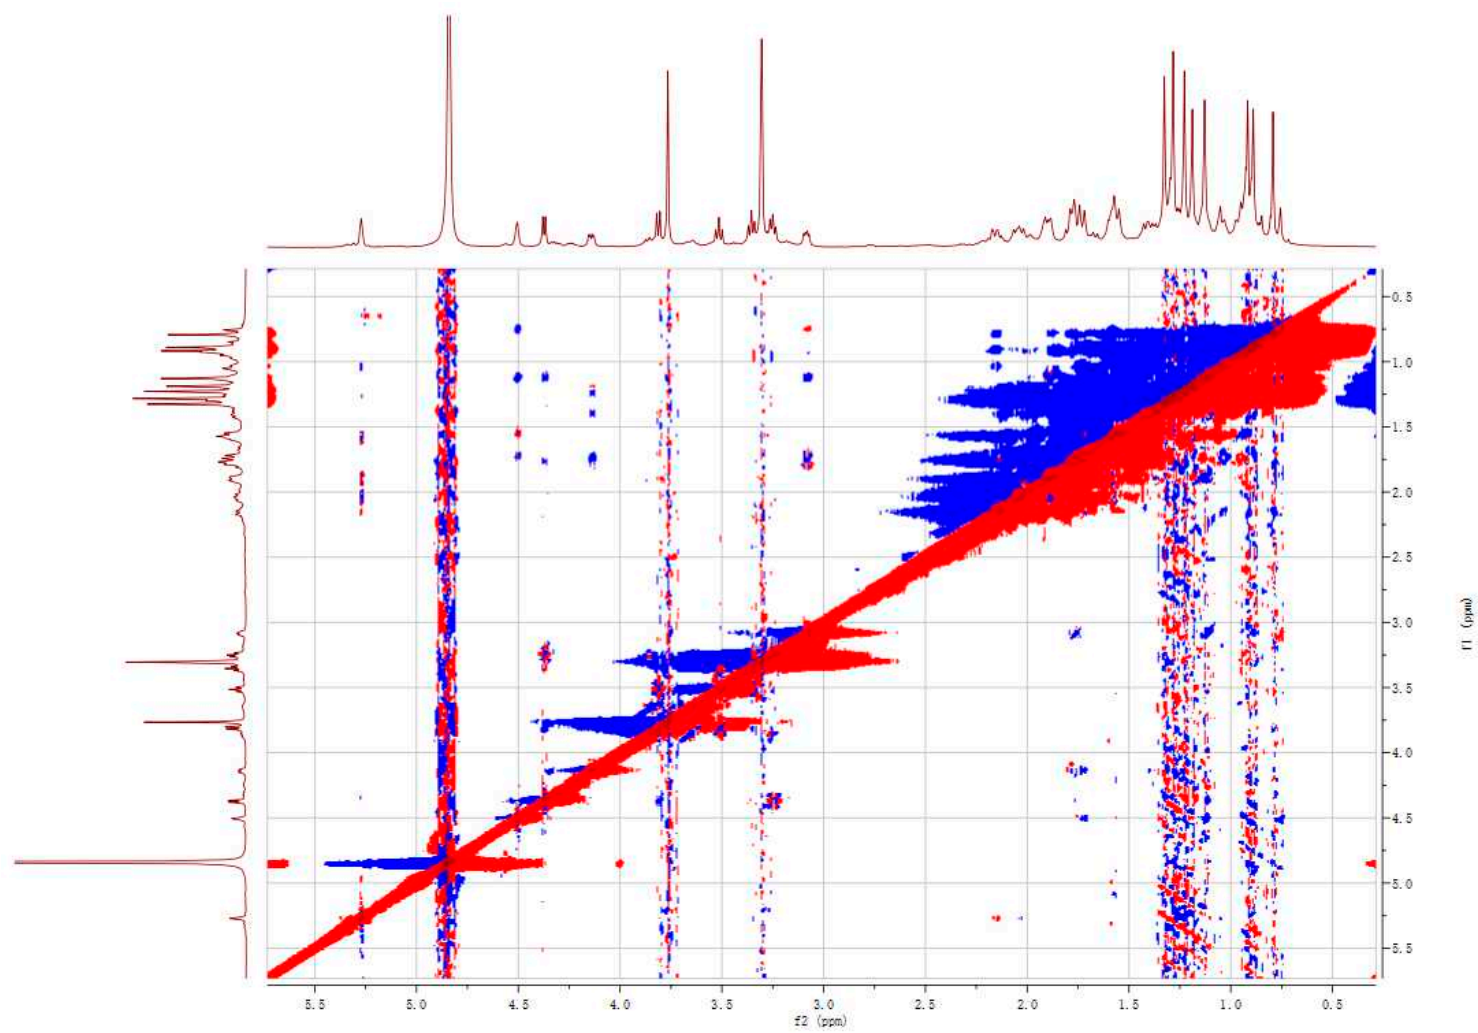

Figure S19. NOESY spectrum ( $\text{CD}_3\text{OD}$ ) of compound 3

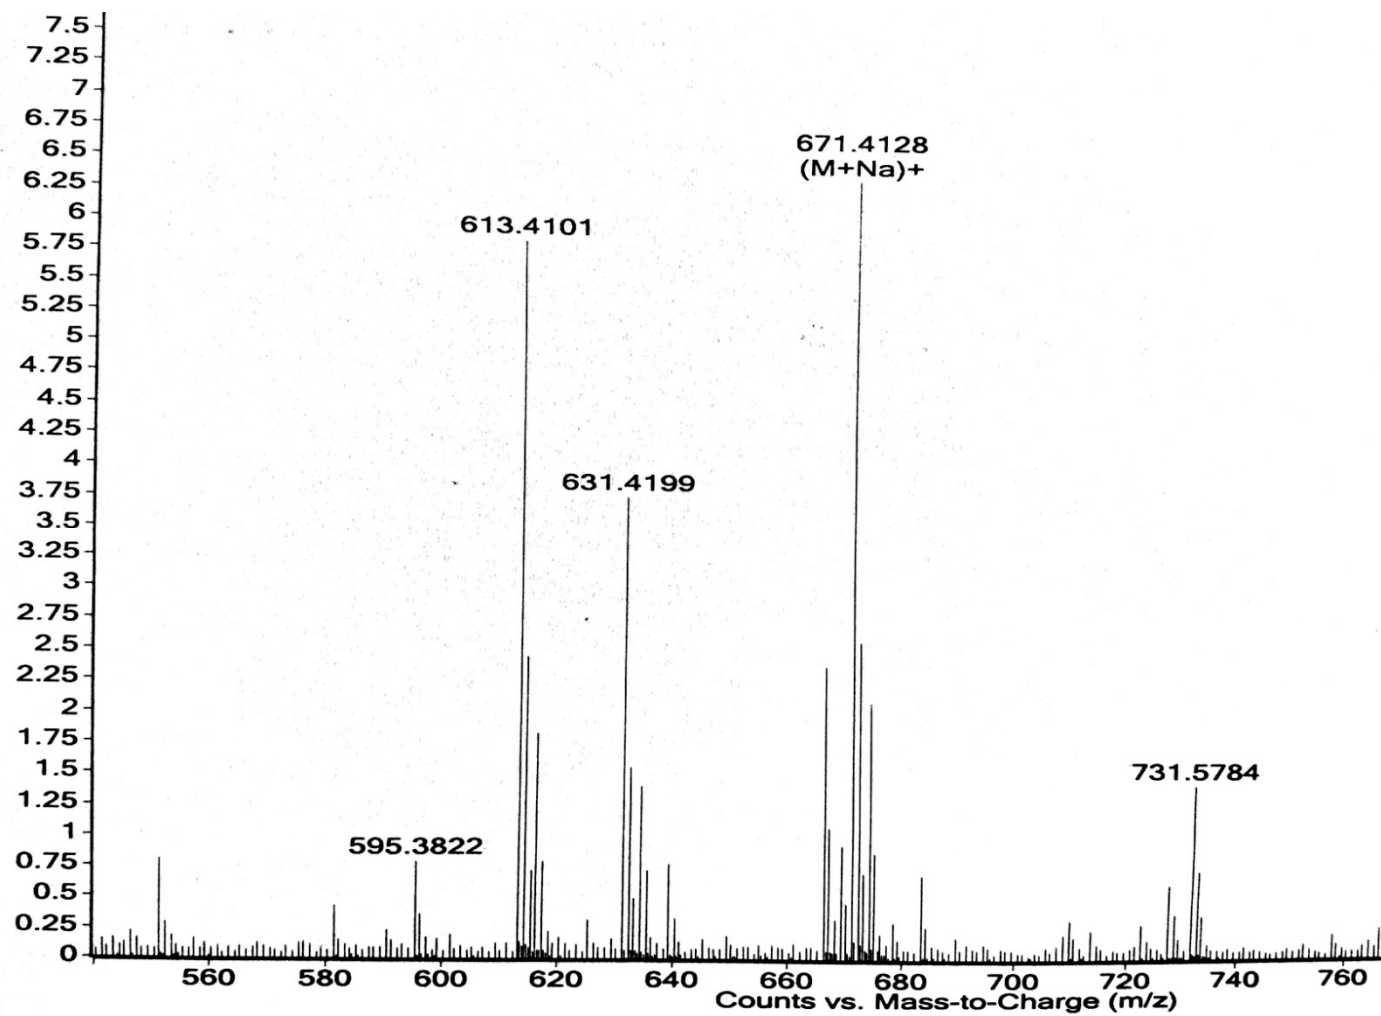

Figure S20. HRESIMS spectrum of compound 3

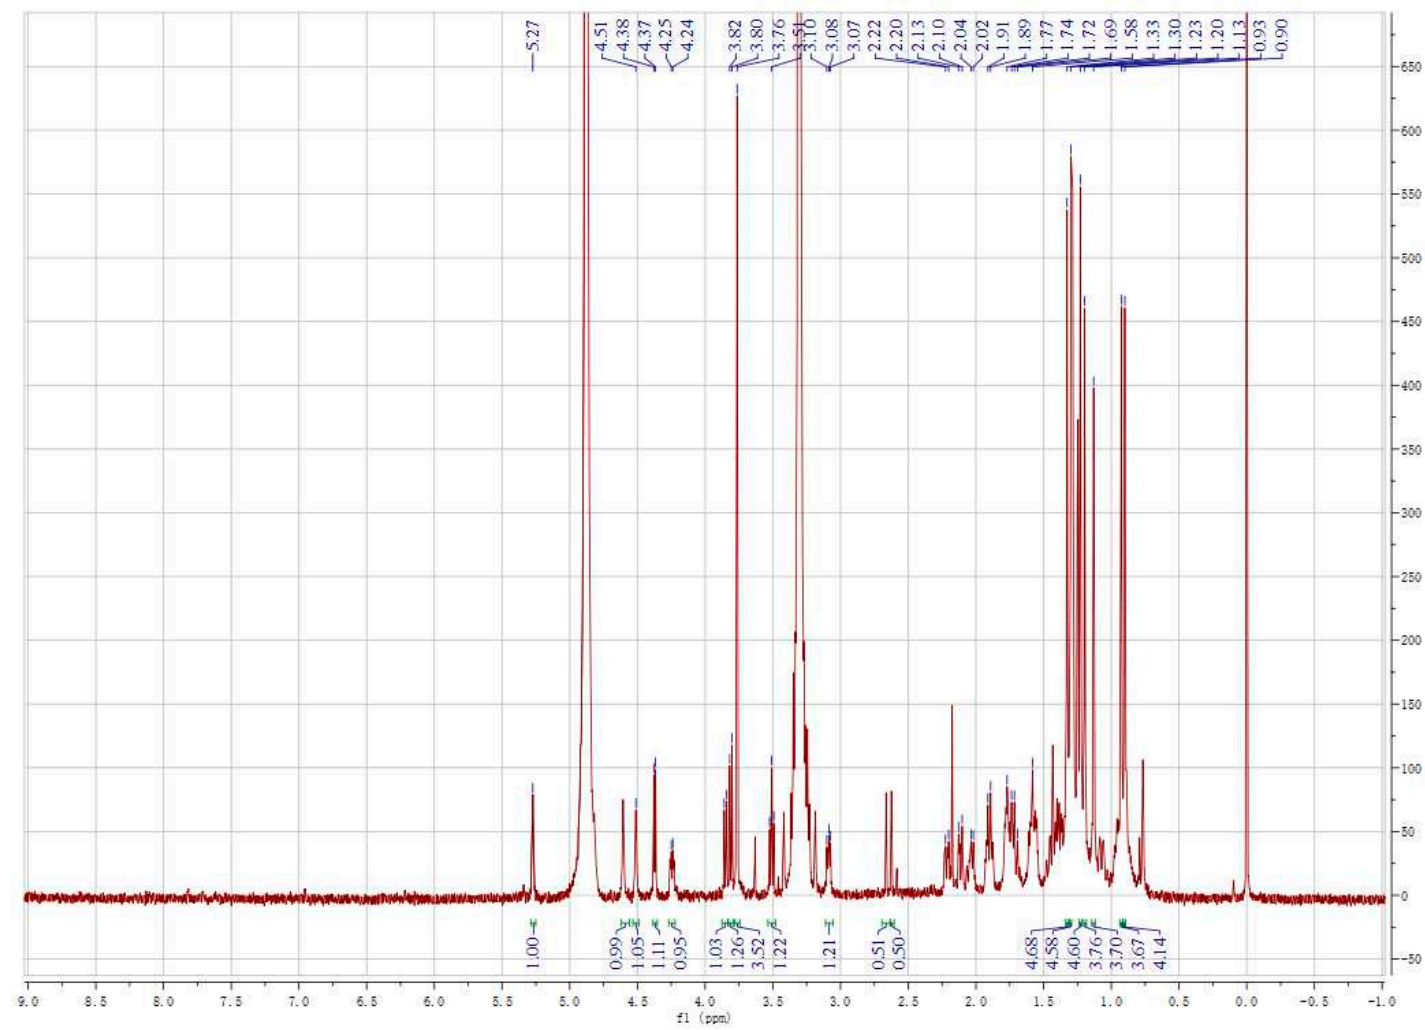

Figure S21.  $^1\text{H}$  NMR (600 MHz,  $\text{CD}_3\text{OD}$ ) spectrum of compound **4**

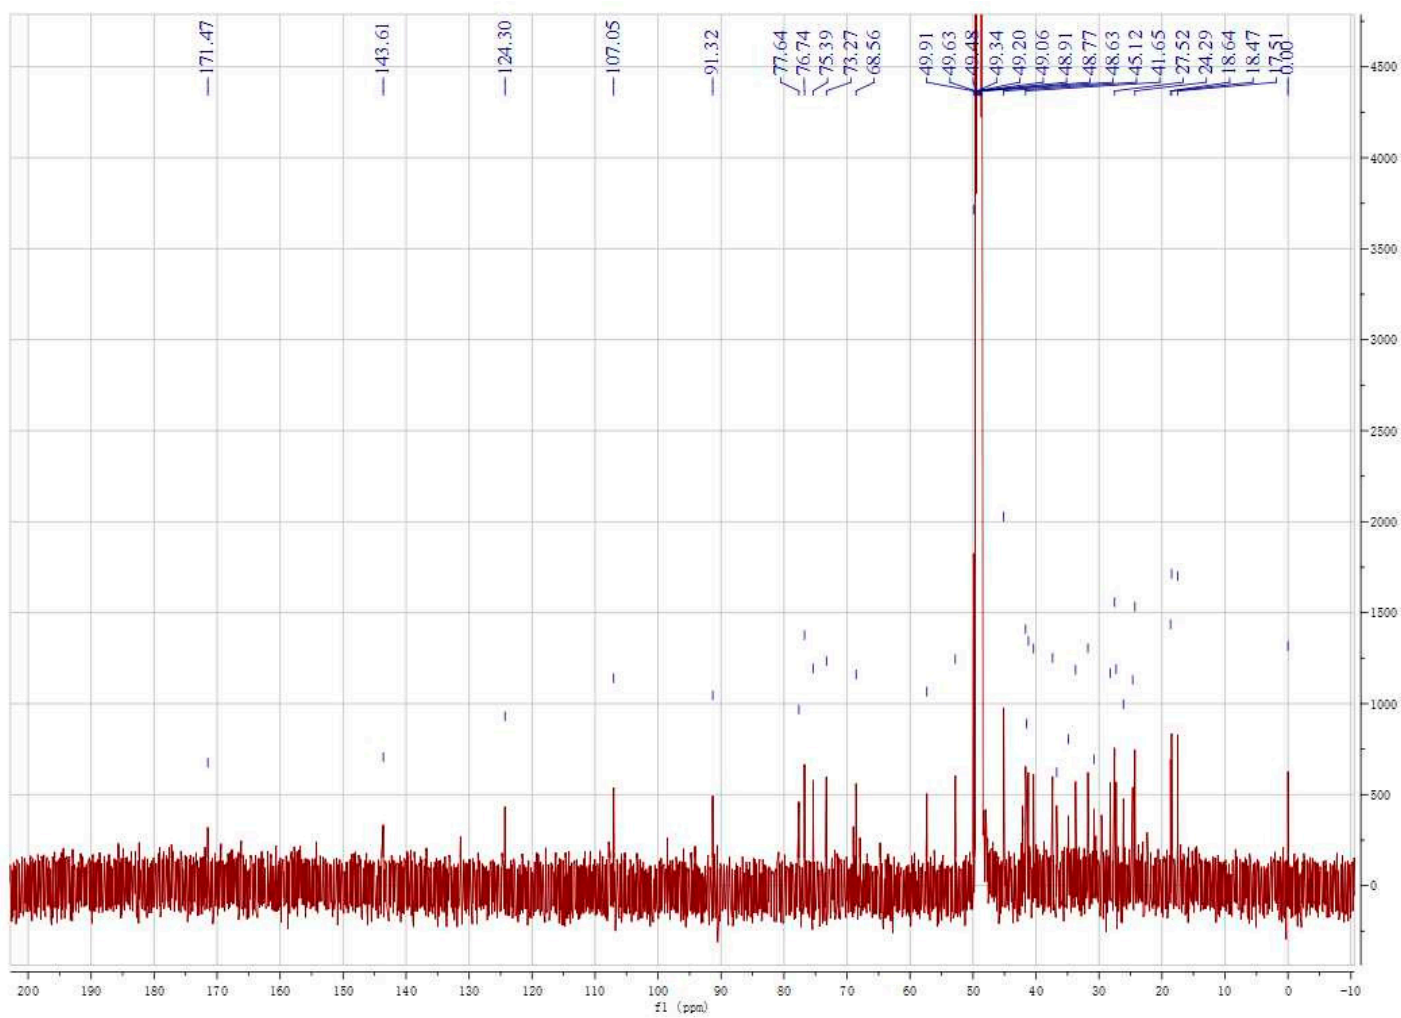

Figure S22.  $^{13}\text{C}$  NMR (150 MHz,  $\text{CD}_3\text{OD}$ ) spectrum of compound 4

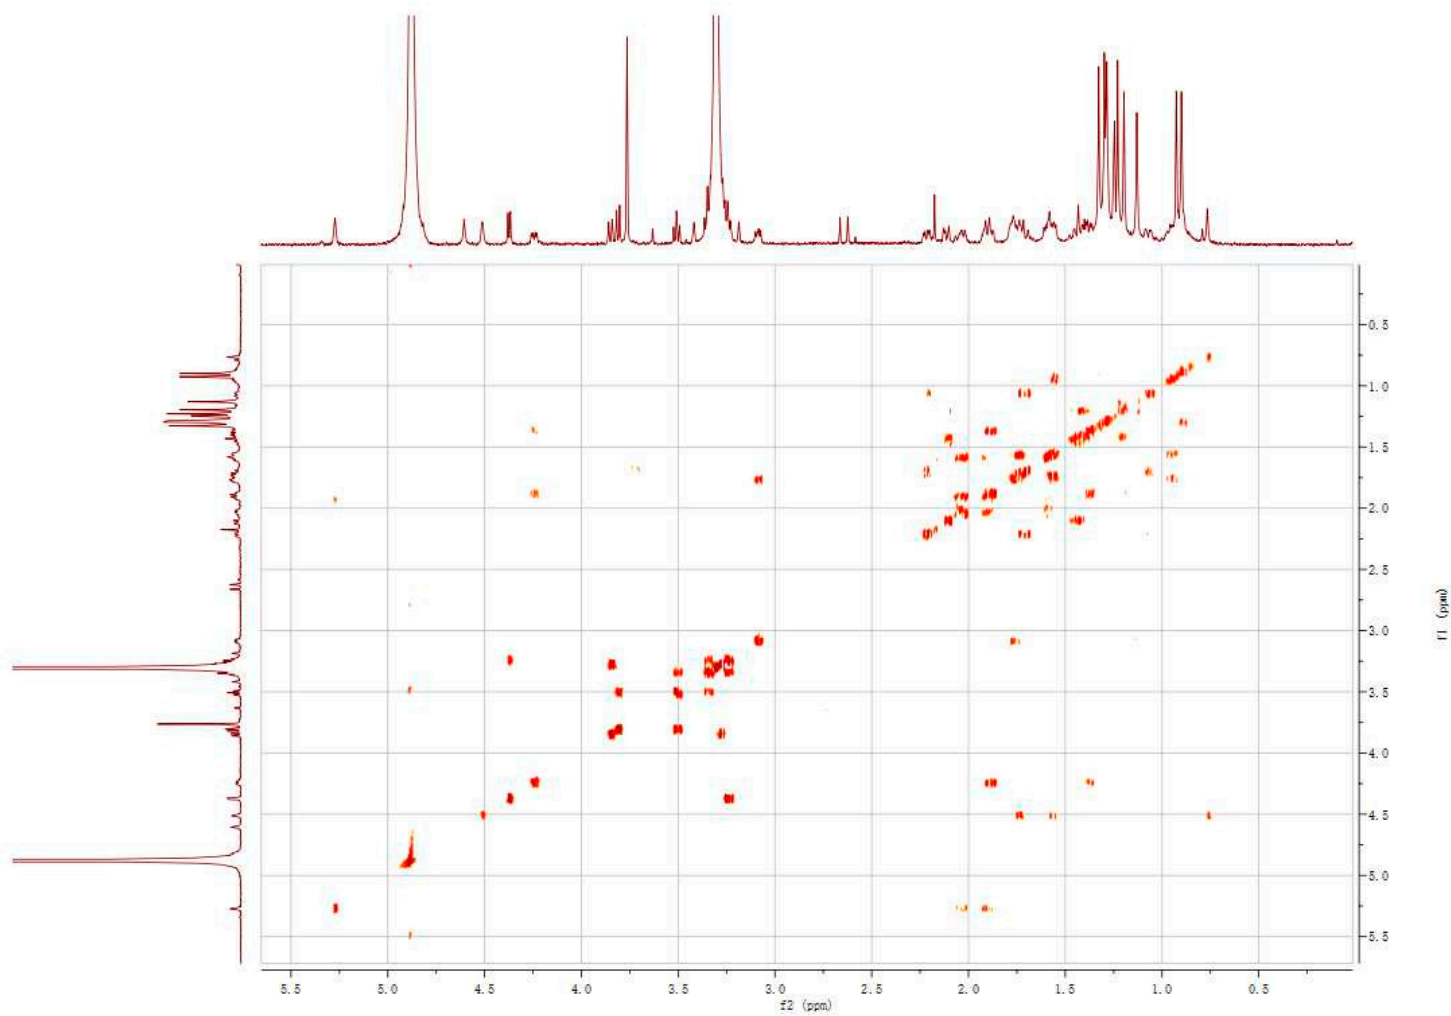

Figure S23.  $^1\text{H}$ - $^1\text{H}$  COSY spectrum ( $\text{CD}_3\text{OD}$ ) of compound 4



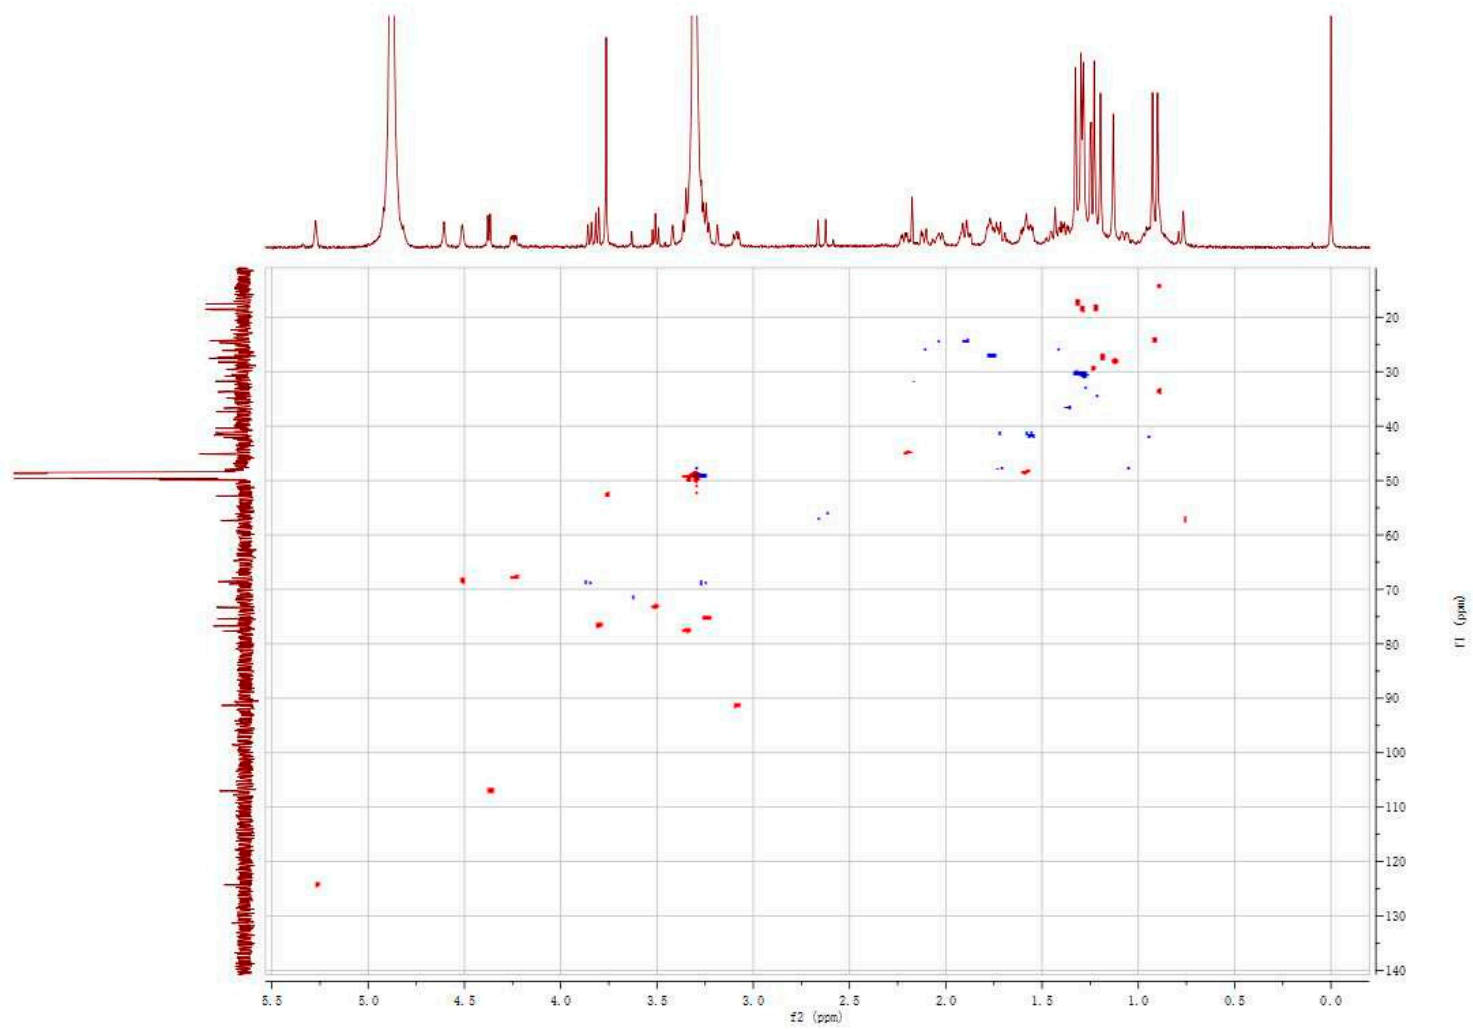

Figure S24. HSQC spectrum (CD<sub>3</sub>OD) of compound 4

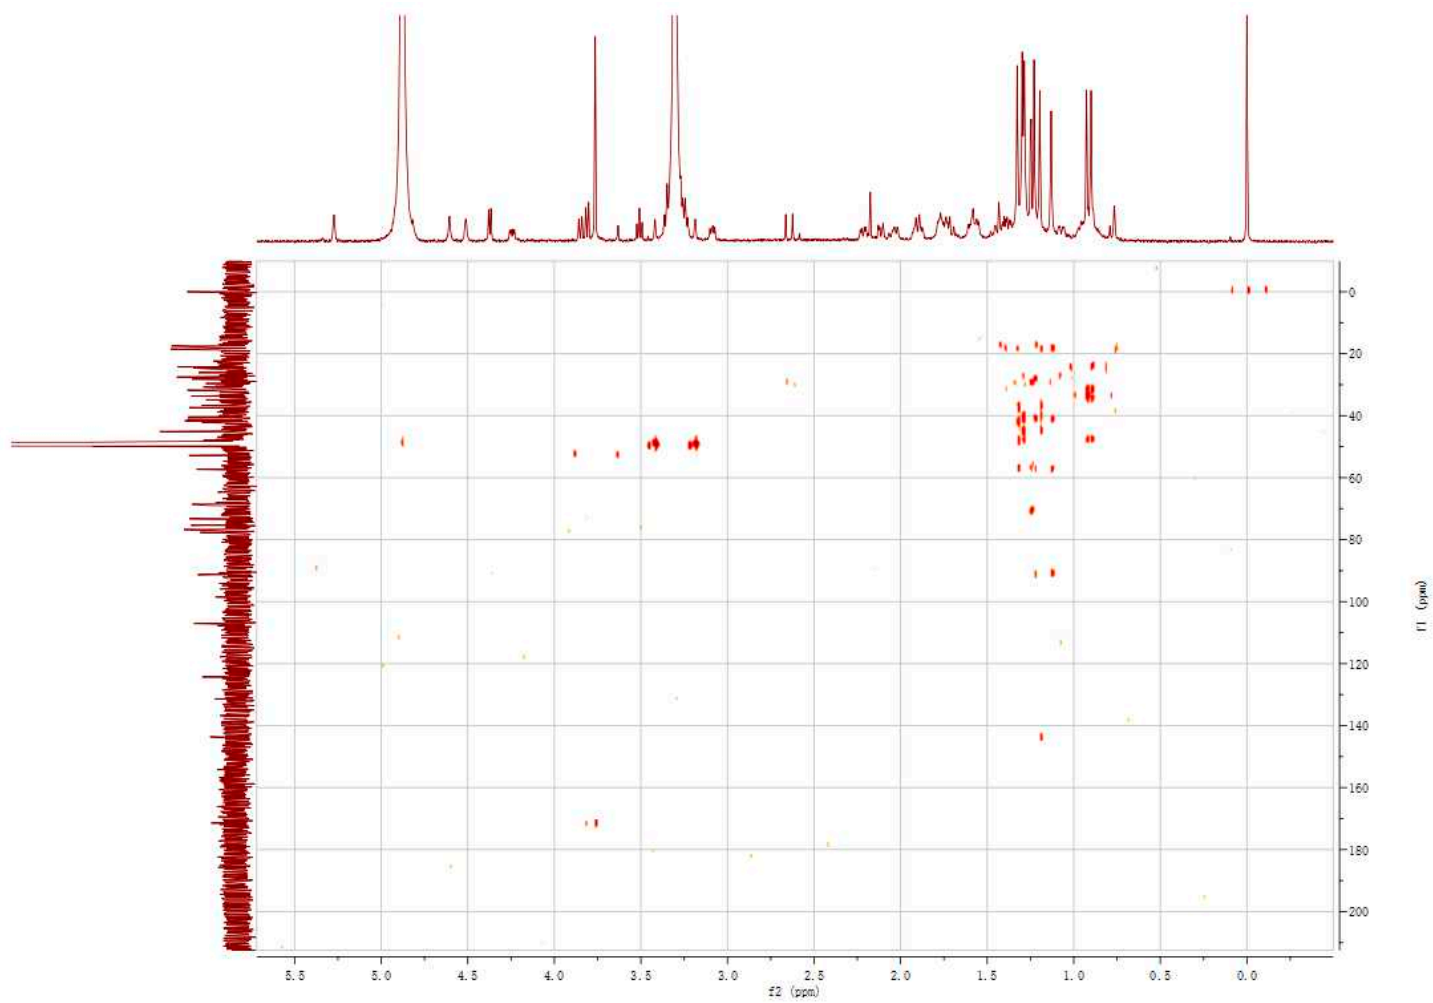

Figure S25. HMBC spectrum ( $\text{CD}_3\text{OD}$ ) of compound **4**

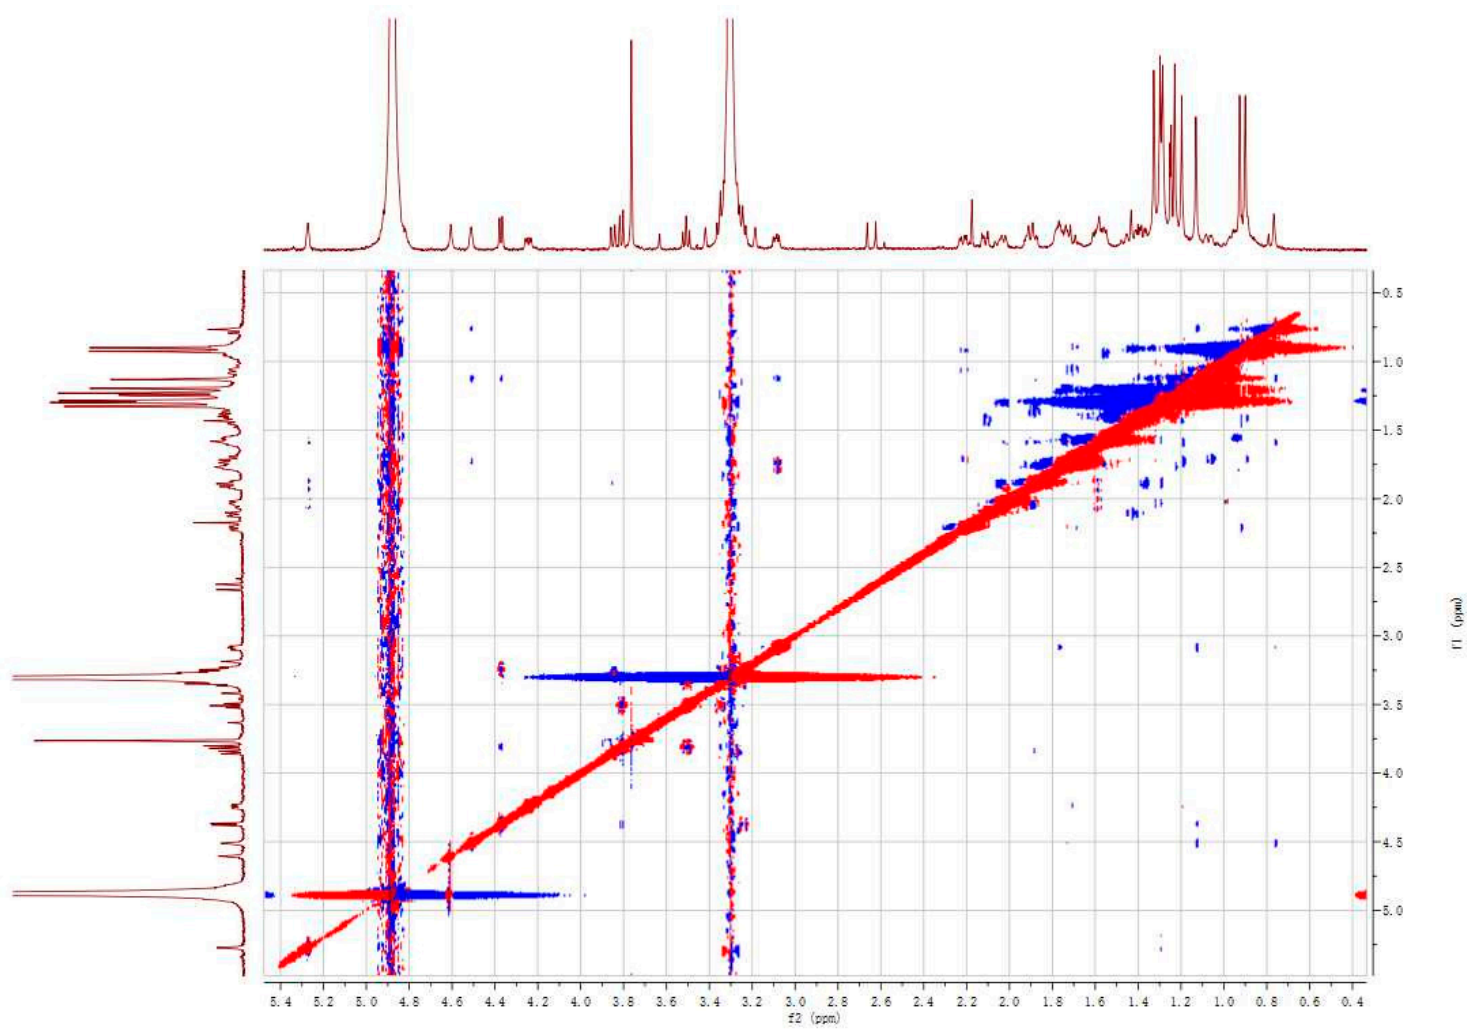

Figure S26. NOESY spectrum (CD<sub>3</sub>OD) of compound 4

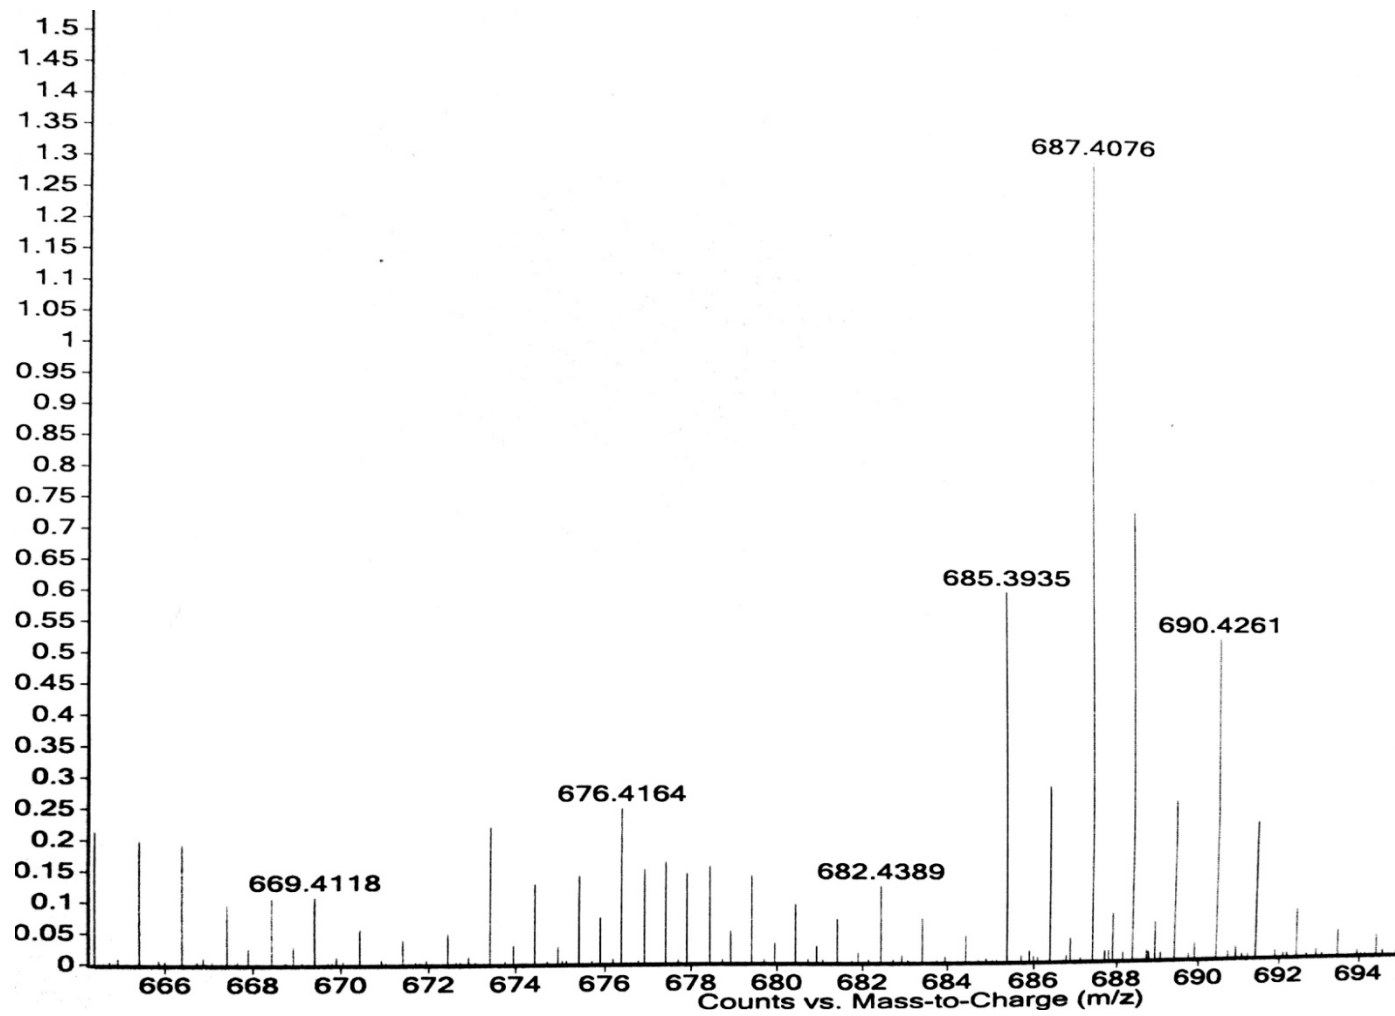

Figure S27. HRESIMS spectrum of compound 4

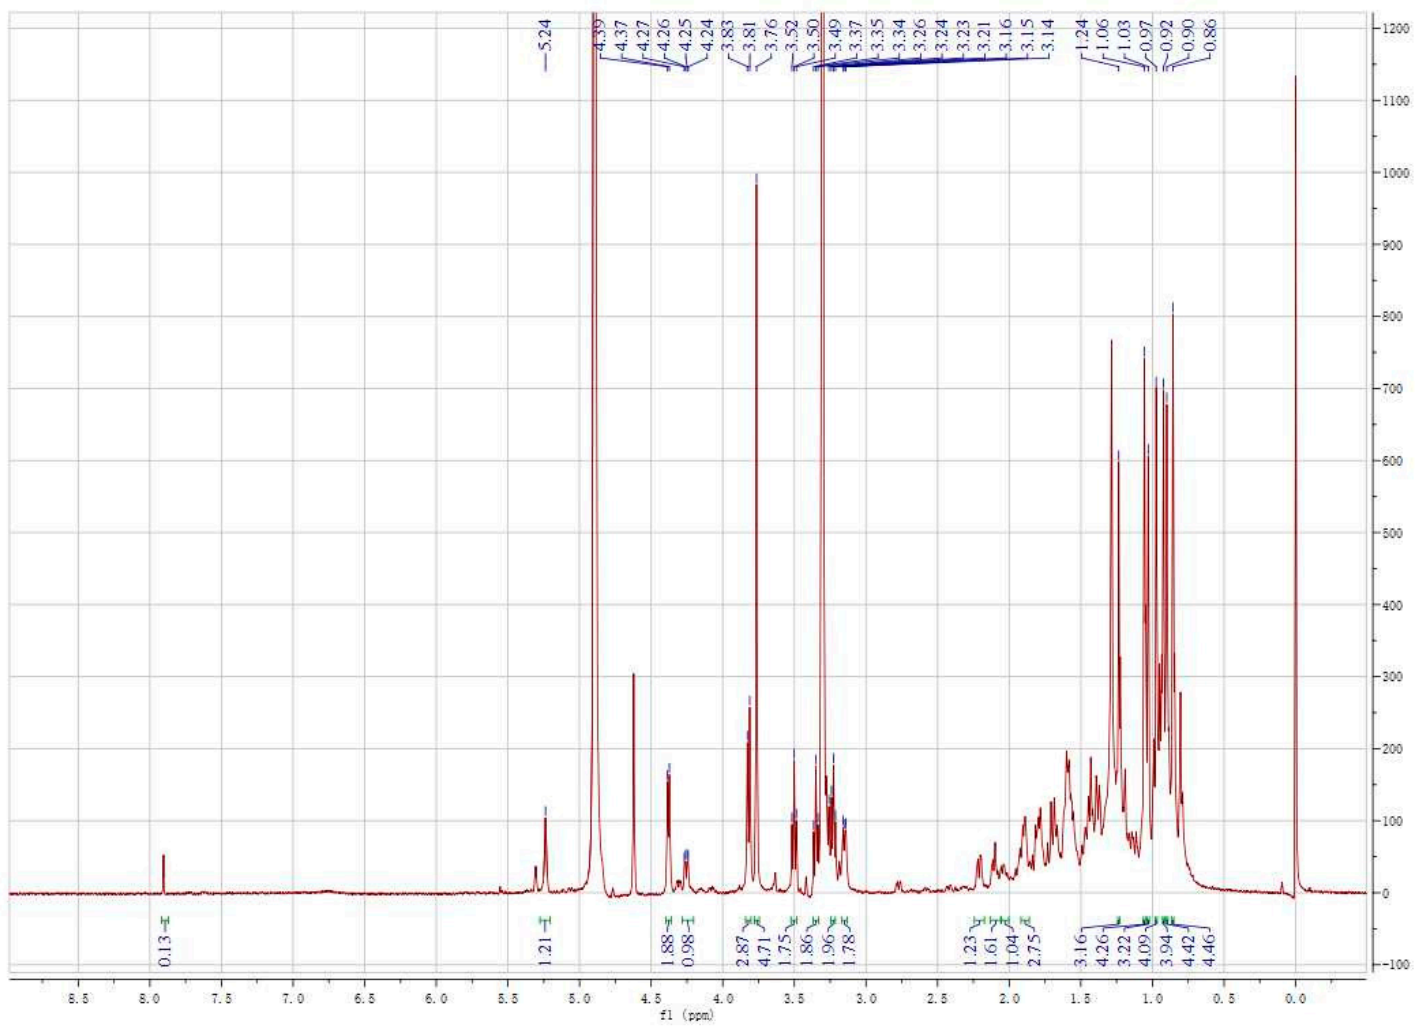

Figure S28.  $^1\text{H}$  NMR (600 MHz,  $\text{CD}_3\text{OD}$ ) spectrum of compound 5

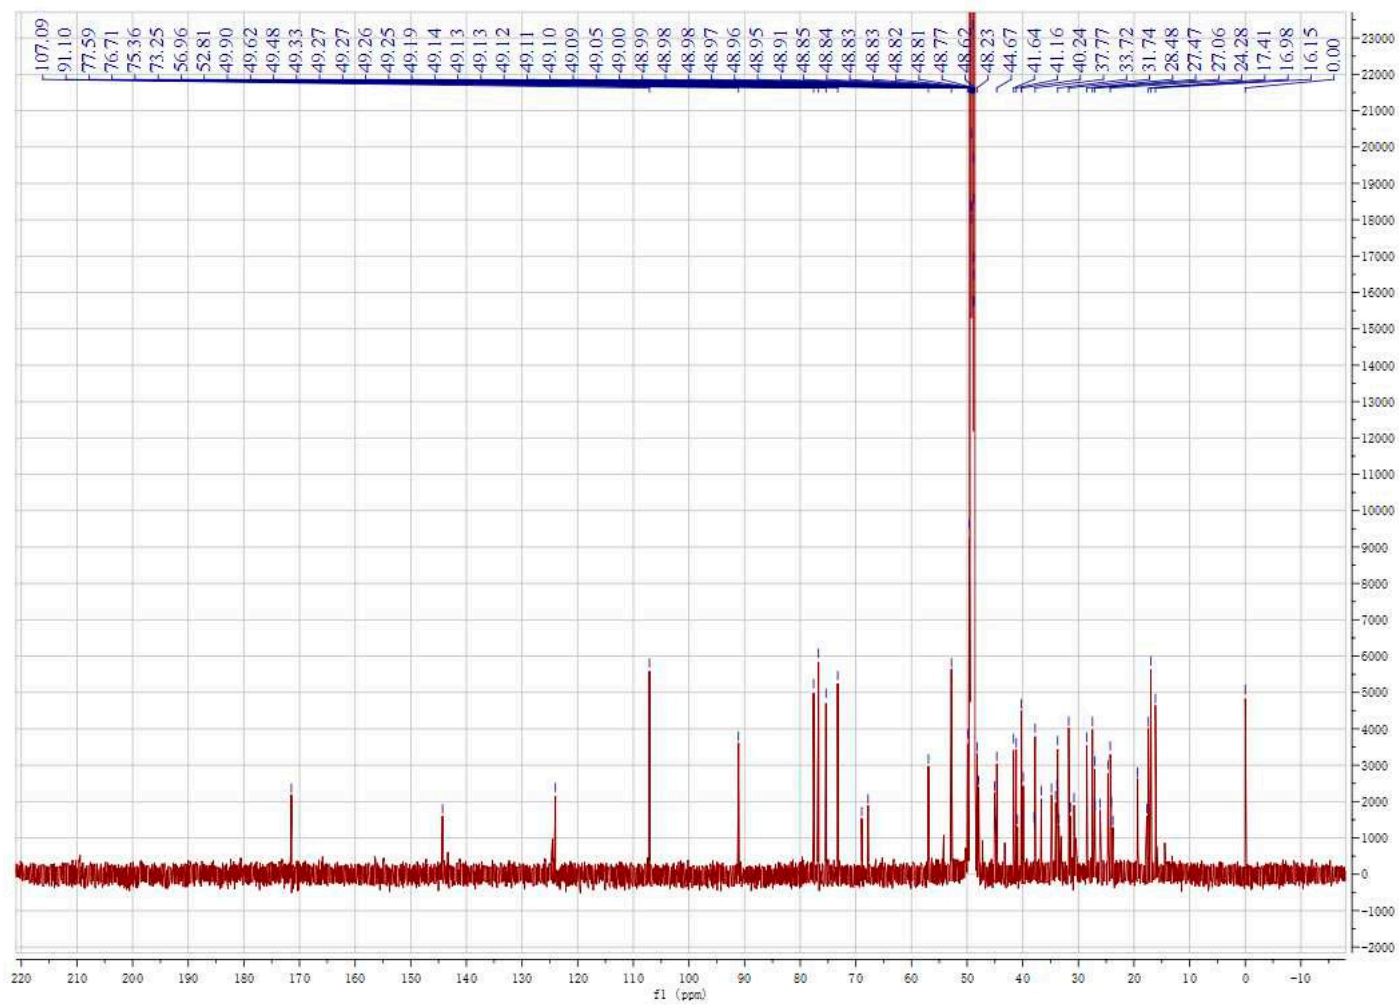

Figure S29.  $^{13}\text{C}$  NMR (150 MHz,  $\text{CD}_3\text{OD}$ ) spectrum of compound 5

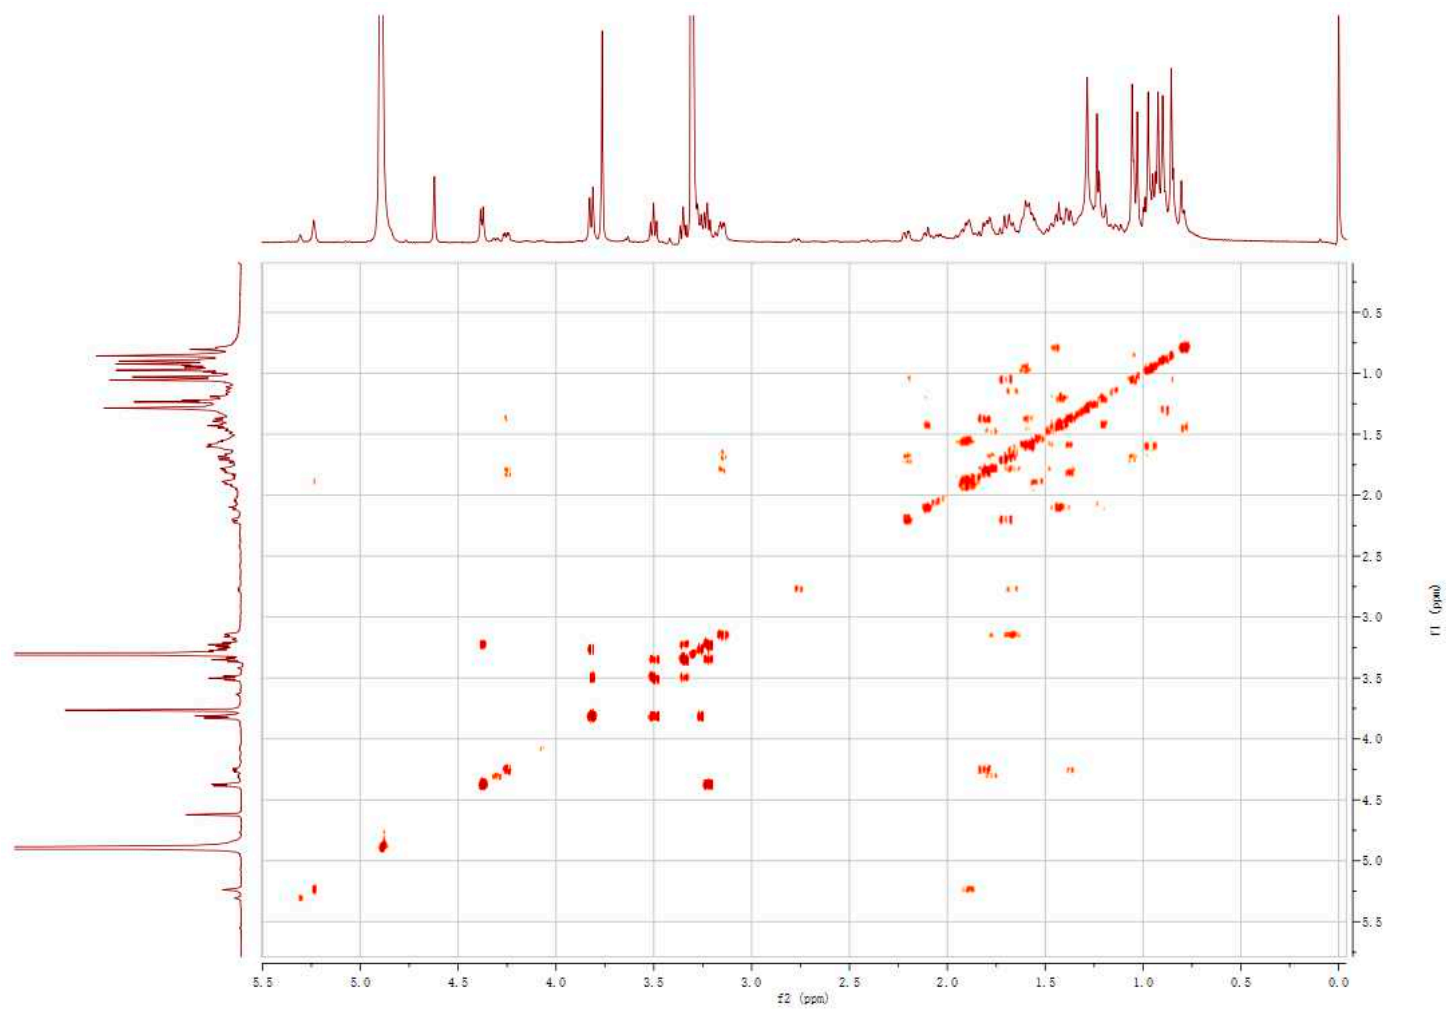

Figure S30.  $^1\text{H}$ - $^1\text{H}$  COSY spectrum ( $\text{CD}_3\text{OD}$ ) of compound 5

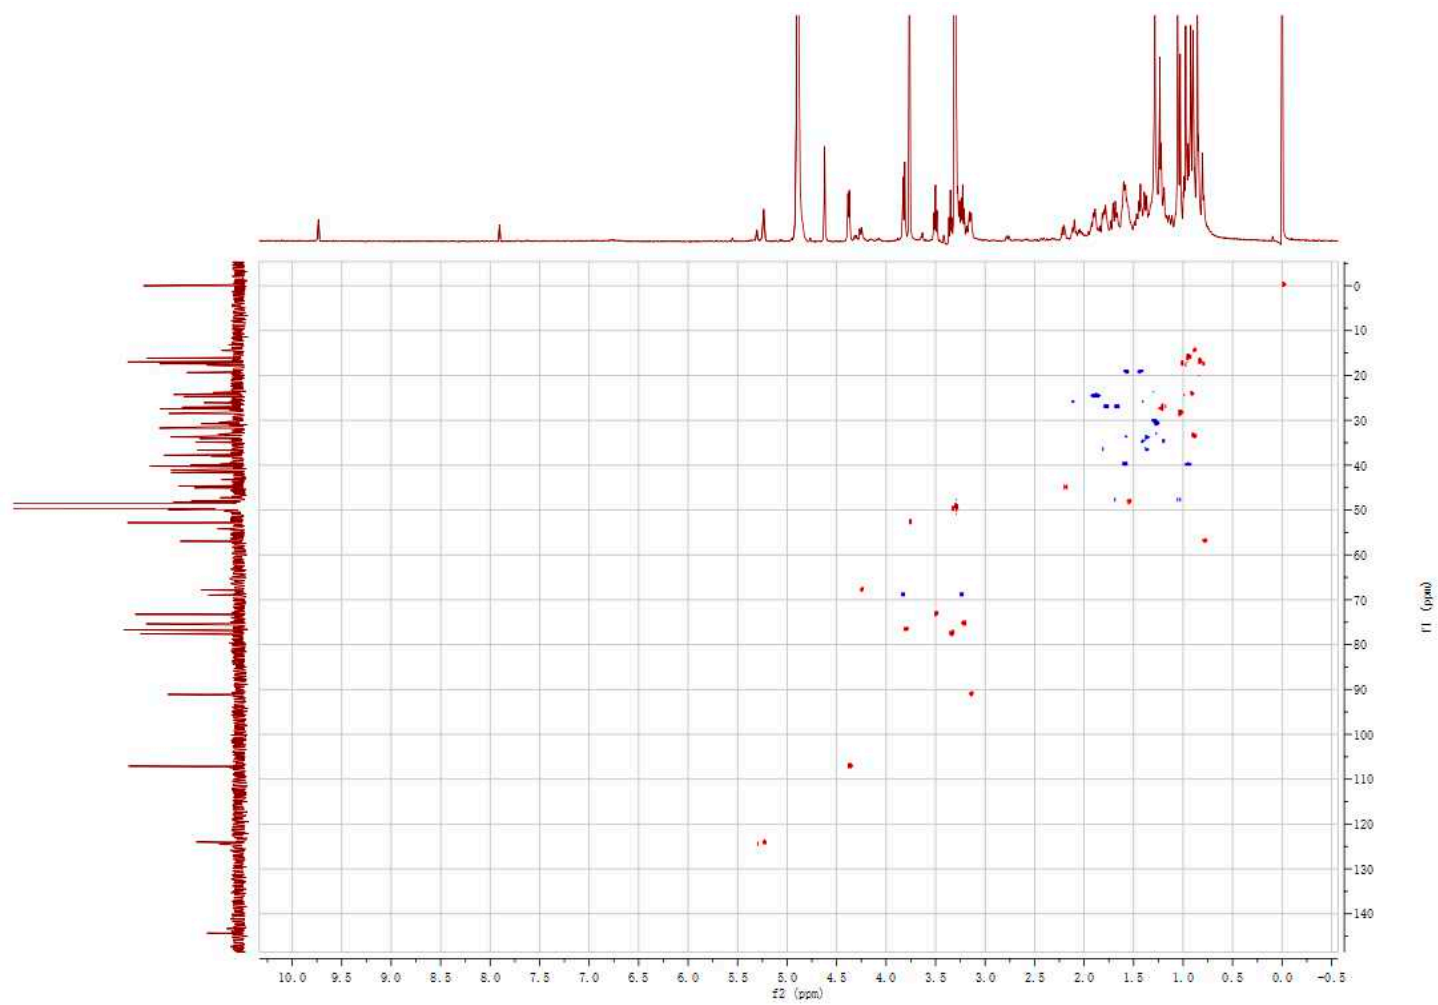

Figure S31. HSQC spectrum (CD<sub>3</sub>OD) of compound 5



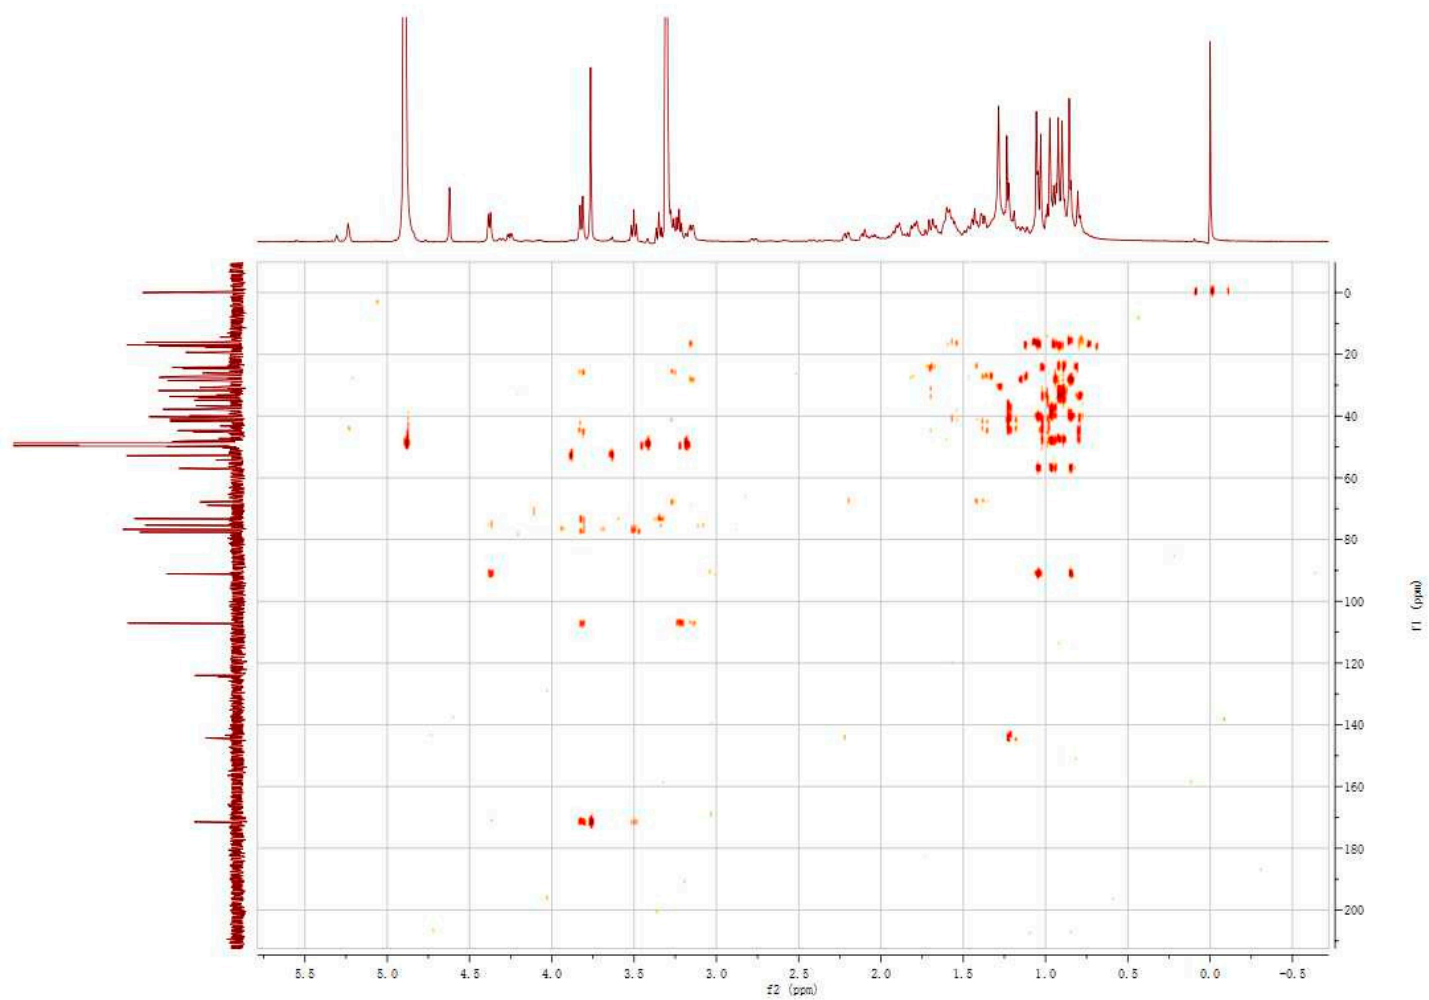

Figure S32. HMBC spectrum (CD<sub>3</sub>OD) of compound 5

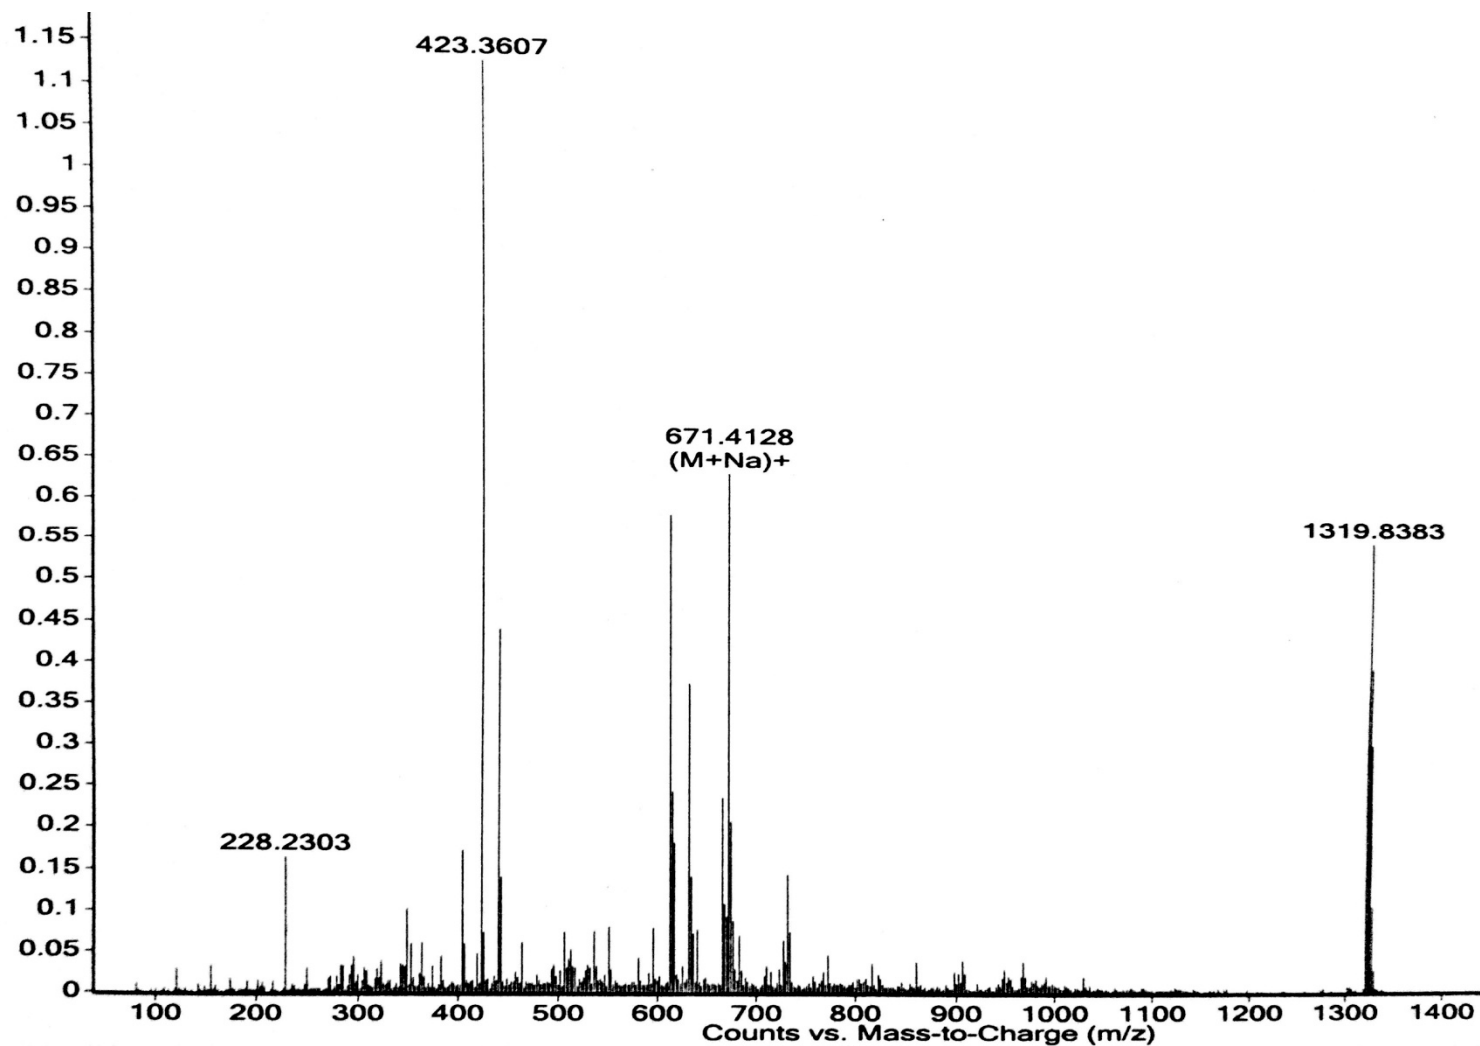

Figure S33. HRESIMS spectrum of compound 5
